# Supplementary material for: Modularity of Zorya defense systems during phage inhibition
Source: Springer Nature journal article supplement (doi:10.1038/s41467-025-57397-2), 2025-03-08
Supplement: MOESM1 [file 41467_2025_57397_MOESM1_ESM.pdf]

**a**

## ZorC

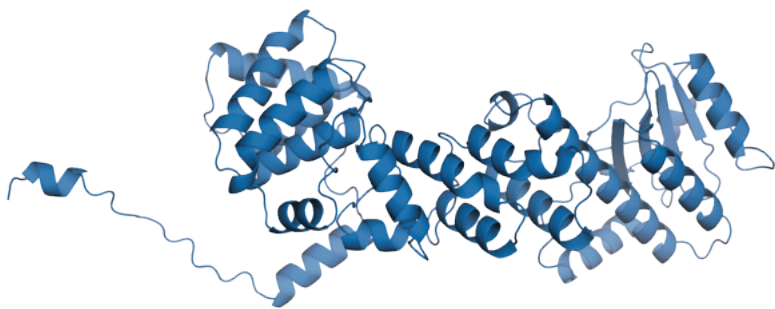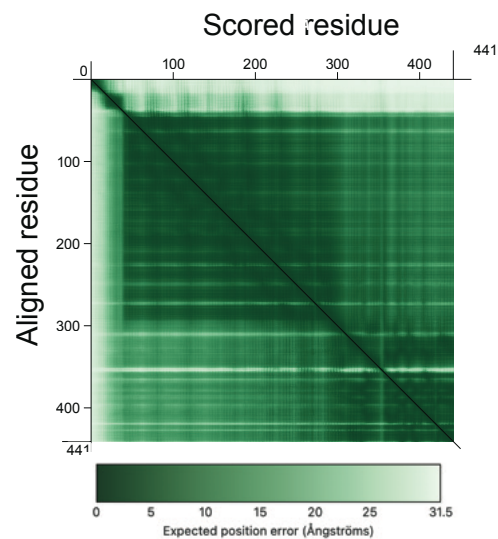**b**

## ZorD

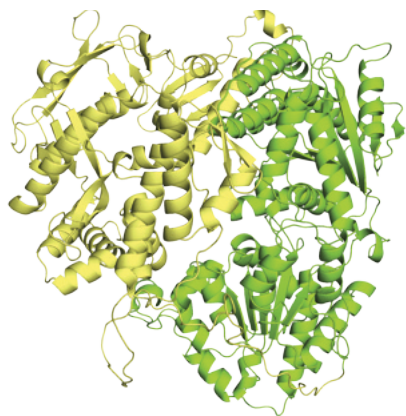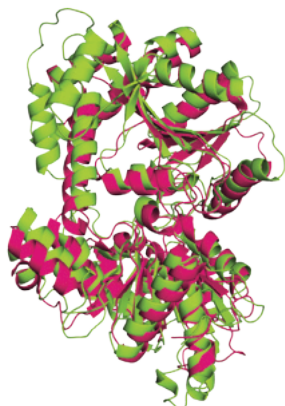

ZorD\_N-term  
ZorD\_C-term  
8ATF

RMSD 3.74 Å

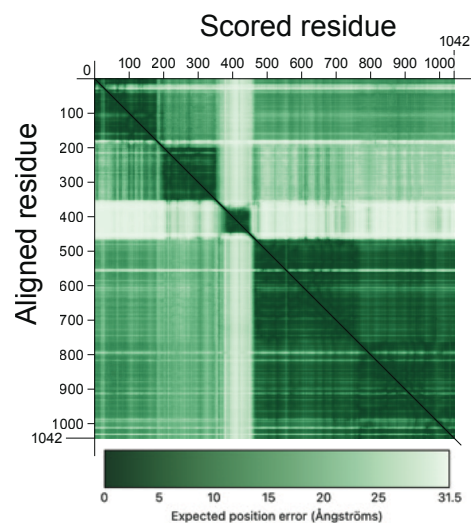**c**

## ZorE

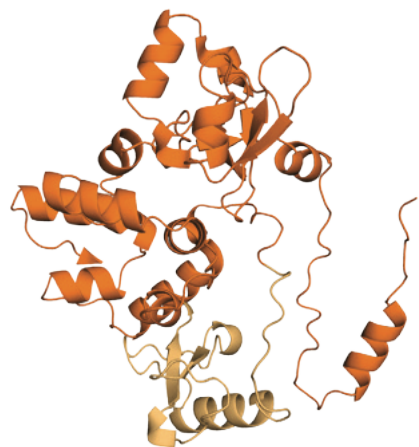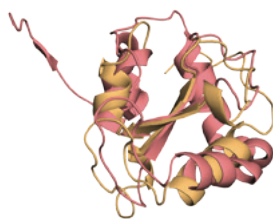

ZorE  
ZorE<sub>187-251</sub>  
5X1H-DotN  
Nuclease

RMSD 3.51 Å

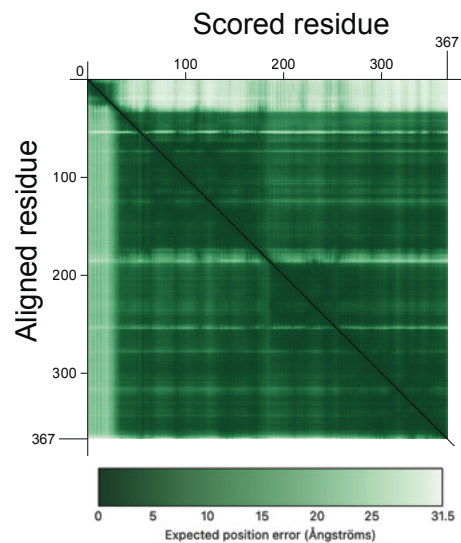

**Supplementary Figure 1. Alphafold models of Zorya I and II accessory components.** **a**, Alphafold model and related PAE error for the predicted structure of ZorC. **b**, Alphafold model and related PAE error for the predicted structure of ZorD. ZorD N-terminal and C-terminal domains highlighted in different shades as shown in panel b. The C-terminal domain of ZorD was aligned with its closest homologue, identified through a Foldseek search (PDB: 8ATF, nucleosome-bound Ino80 ATPase). **c**, Alphafold model and related PAE error for the predicted structure of ZorE. ZorE<sub>187-251</sub> residues are highlighted in lighter orange. A Foldseek search showed that ZorE<sub>187-251</sub> residues align with the DotN nuclease domain (PDB: 5X1H)

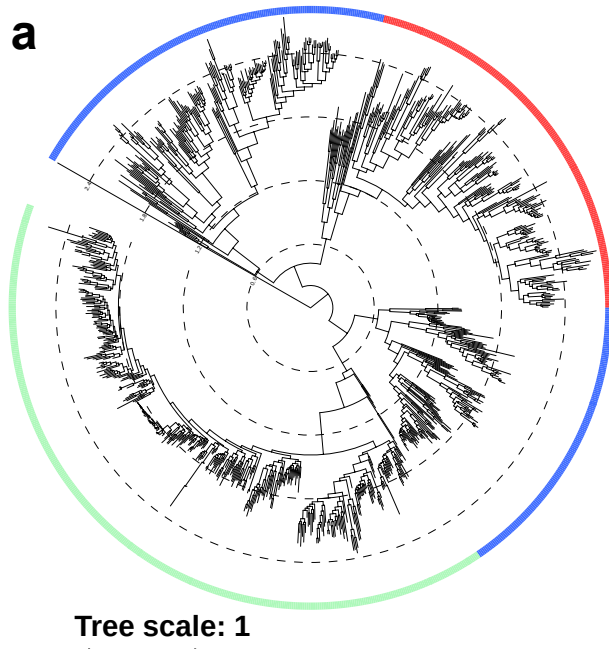

Zorya I Zorya II Zorya III

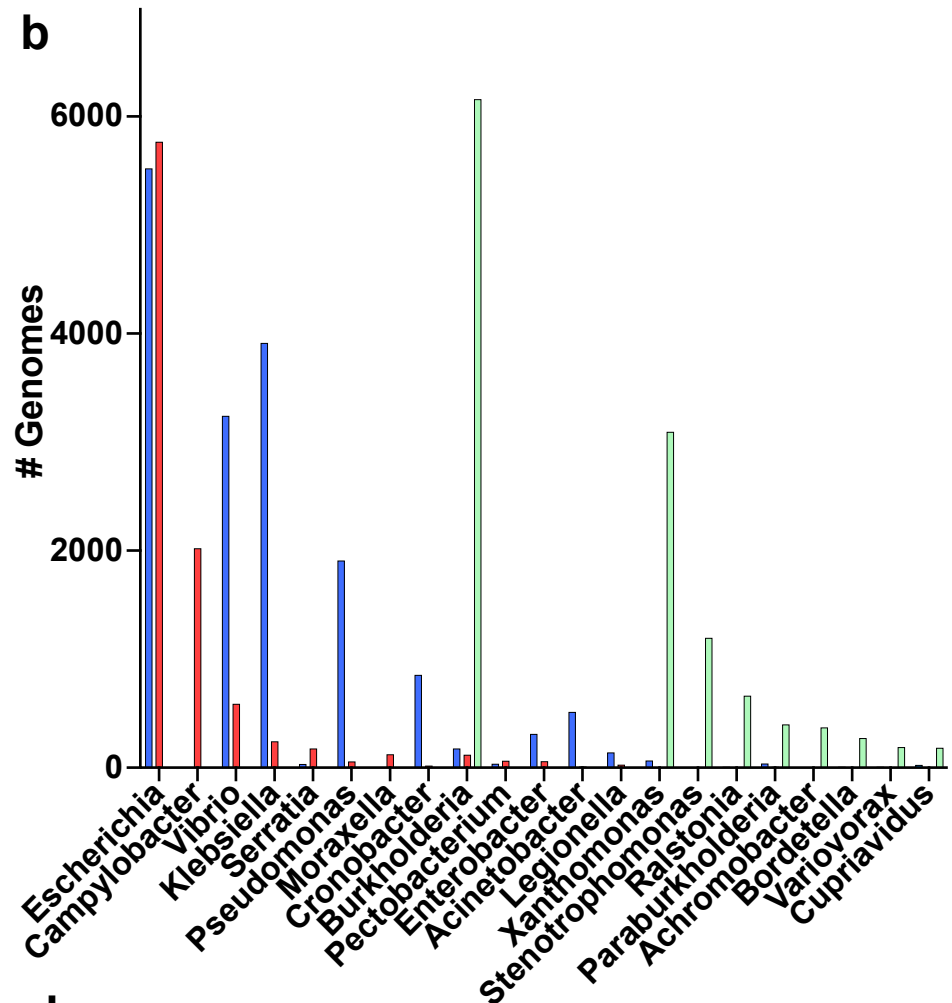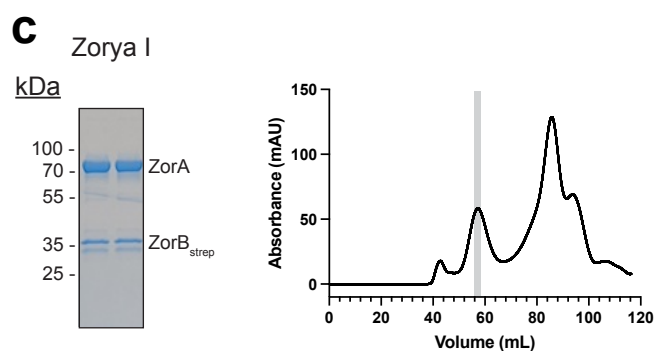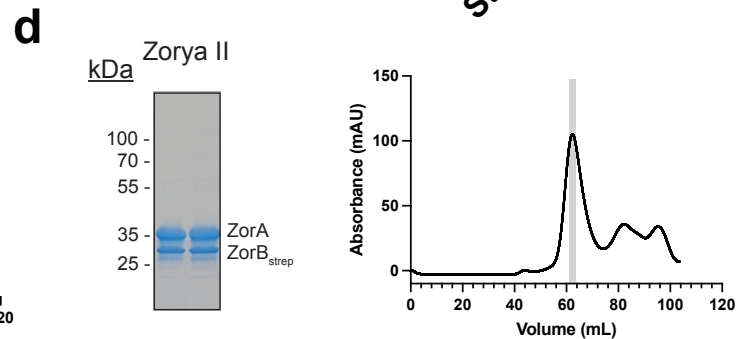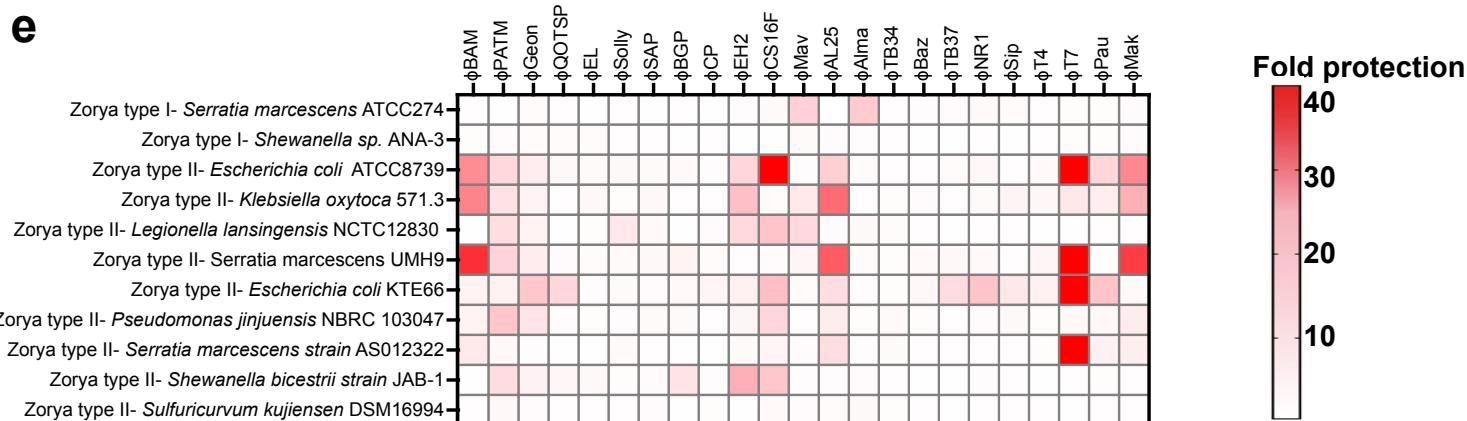

**Supplementary Figure 2.** **a**, Phylogenetic tree based on the concatenated alignments of the sequences of ZorA and ZorB from each Zorya subtype. **b**, Bar-chart summarising the phylogenetic distribution of Zorya I, Zorya II and Zorya III. **c**, SDS-PAGE gel and size-exclusion chromatogram of purified *Shewanella* sp. strain ANA-3 ZorAB. **d**, SDS-PAGE gel and size-exclusion chromatogram of purified *Sulfuricurvum kujiense* ZorAB. Grey boxes represent fractions used for structural studies. **e**, The anti-phage activity of Zorya I and Zorya II homologues was evaluated by calculation of their fold protection against a suite of coliphages when over-expressed in *E. coli* MT56. Fold protection was calculated by dividing the value of efficiency of plating (EOP) for strains expressing each tested homologue by the EOP value of a strain carrying the empty vector (pGM39), when infected with phages as shown in the figure.



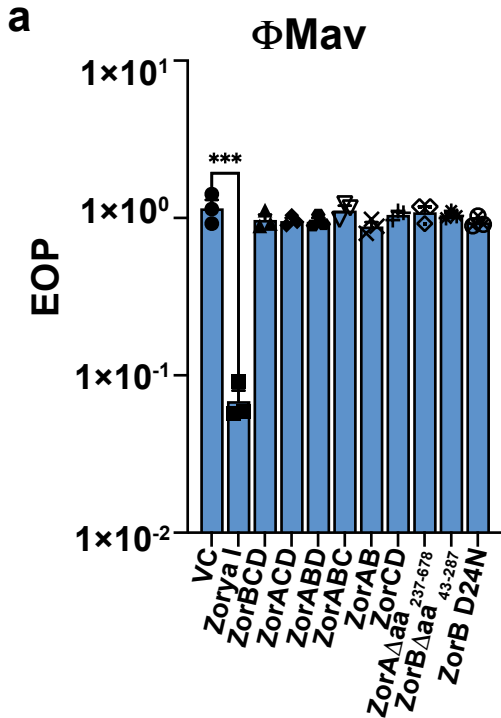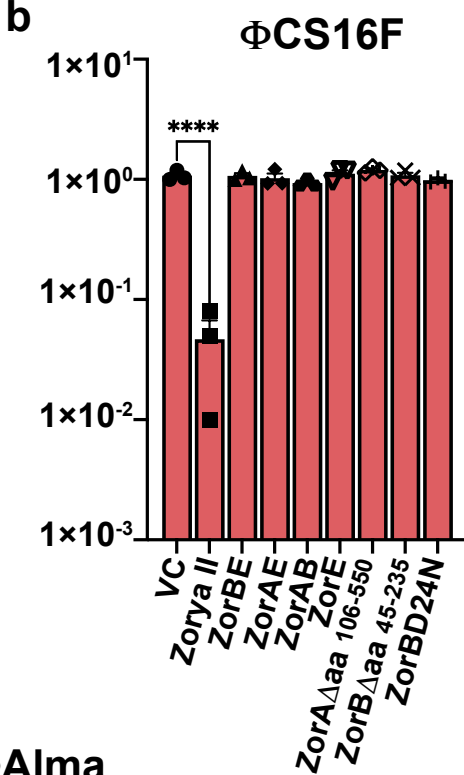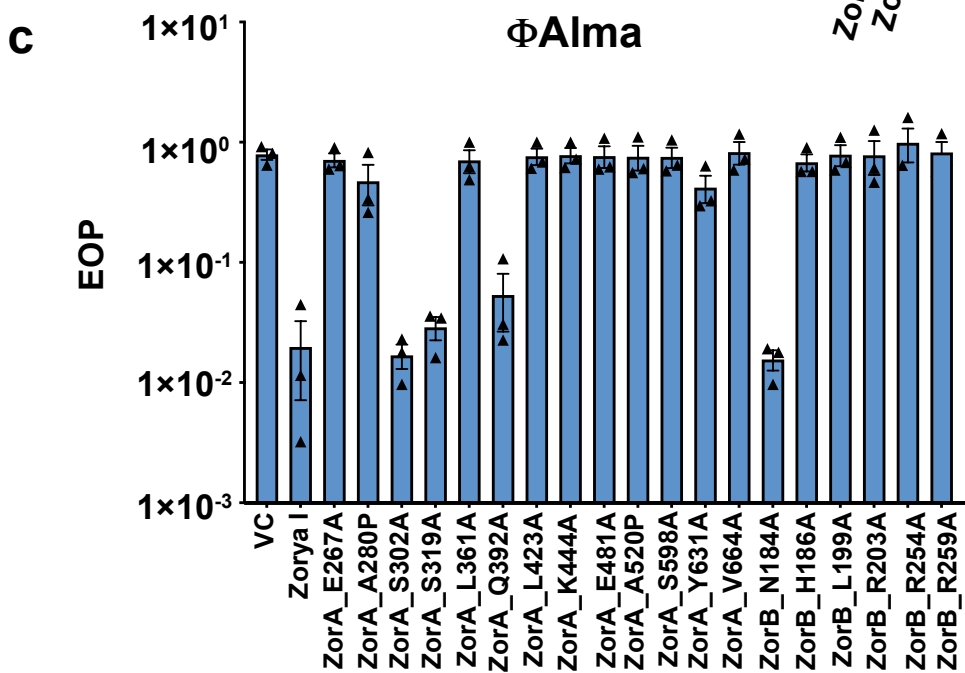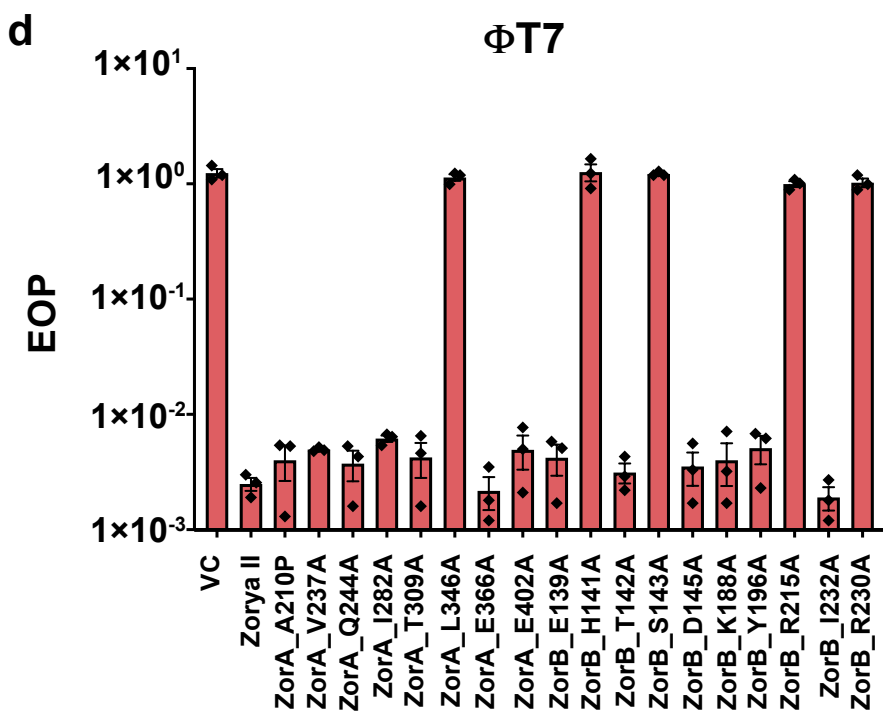

**Supplementary Figure 3.** **a**, Efficiency of plating (EOP) measurement for *E. coli* MT56 carrying empty vector (VC, pGM39) or the same plasmid encoding Zorya I, ZorA I, ZorB I, ZorABC, ZorABD, ZorBDC, ZorAB I, ZorCD, ZorB D24N, ZorA I $\Delta$ aa237-696 and ZorB I $\Delta$ aa43-287 when infected with phage  $\phi$ Mav. Points show mean  $\pm$  SEM (n = 3 biological replicates). **b**, Efficiency of plating (EOP) measurement for *E. coli* MT56 carrying empty vector (VC, pGM39) or the same plasmid encoding Zorya II, ZorA II, ZorB II, ZorAB II, ZorE, ZorB D24N, ZorA I $\Delta$ aa106-550 and ZorB I $\Delta$ aa45-235 when infected with phage  $\phi$ CS16F. Points show mean  $\pm$  SEM (n = 3 biological replicates). **c**, Efficiency of plating (EOP) measurement for *E. coli* MT56 harbouring empty vector (VC, pGM39), the same plasmid encoding wild-type Zorya I or a version of Zorya I where single point mutations were introduced in ZorA I or ZorB I, as indicated in panel **c**, when infected with  $\phi$ Alma. **d**, Efficiency of plating (EOP) measurement for *E. coli* MT56 expressing empty vector (VC, pGM39), the same plasmid encoding wild-type Zorya II or a version of Zorya II carrying point mutations in ZorA II or ZorB II, as indicated in panel **d**, when infected with  $\phi$ T7. Induction of each construct was performed by addition of 0.02% L-Rhamnose. For all panels, points show mean  $\pm$  SEM (n = 3 biological replicates). Statistical significance for each panel was calculated with Graphpad applying a one-way ANOVA with Dunnett's multiple comparison test. No significance was detected, unless indicated (\* $p \leq 0.05$ ). For Panel **h** and **i**, the statistical analysis results is reported in Table S4.

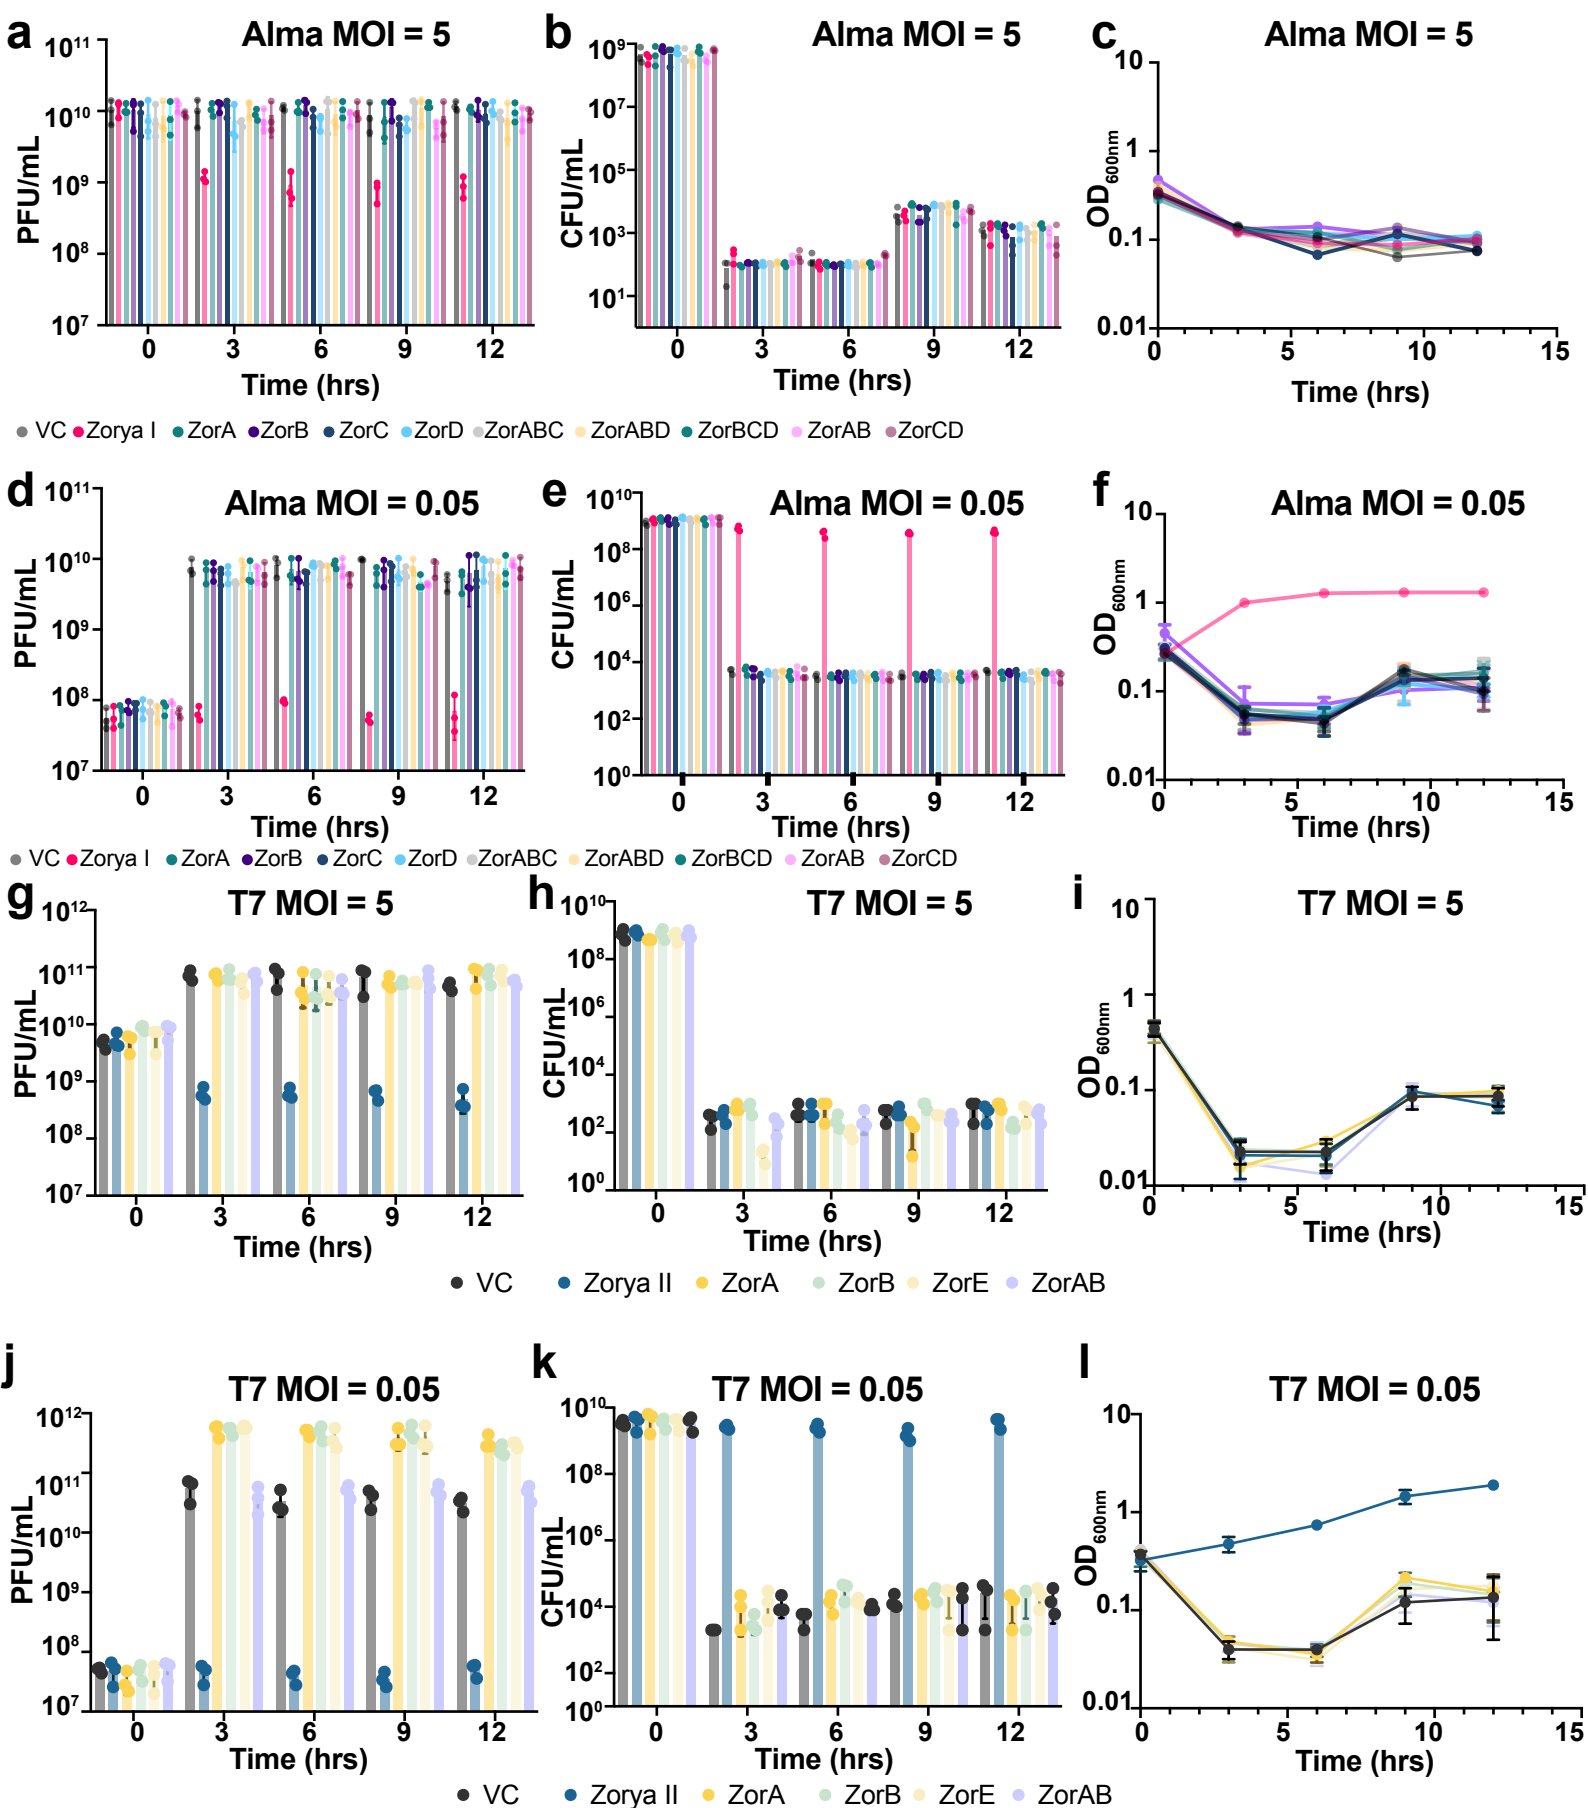

**Supplementary Figure 4. Zorya I and Zorya II act through population wide immunity.** *E. coli* MT56 harbouring plasmids as shown in panel **a-f** were grown in LB supplemented with 0.02% *L*-Rhamnose and infected with  $\phi$ Alma at MOI 5 or 0.05. The **a,d**, titre (PFU/mL), **b,e**, cell counts (CFU/mL) and **c,f** the growth rate ( $OD_{600nm}$ ) of each culture was measured at several timepoints, as shown in panels **a-f**, over the course of 12 hrs post infection. **g-l**, *E. coli* MT56 carrying VC or Zorya II were grown in LB supplemented with 0.02% *L*-Rhamnose and infected with  $\phi$ T7 at MOI 5 or 0.05. The **g,j**, titre (PFU/mL), **h,k**, cell counts (CFU/mL) and **i,l**, the growth rate ( $OD_{600nm}$ ) of each culture was measured at several timepoints, as shown in panels **g-l**, over the course of 12 hrs post infection. For all panels, points show mean  $\pm$  SEM (n = 3 biological replicates). Statistical significance was calculated with Graphpad applying a one-way ANOVA with Dunnett's multiple comparison test. No significance was detected, unless indicated (\* $p \leq 0.05$ ).

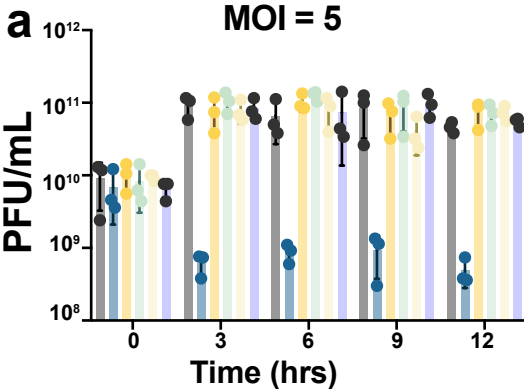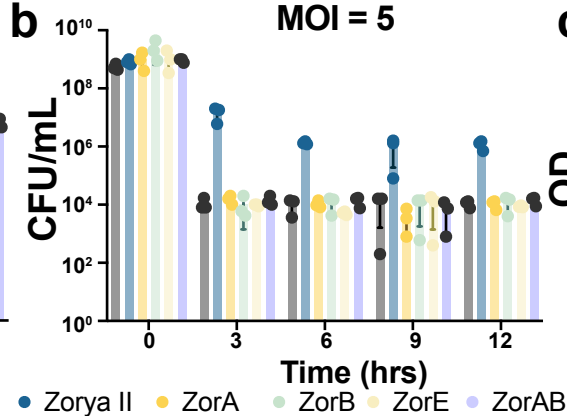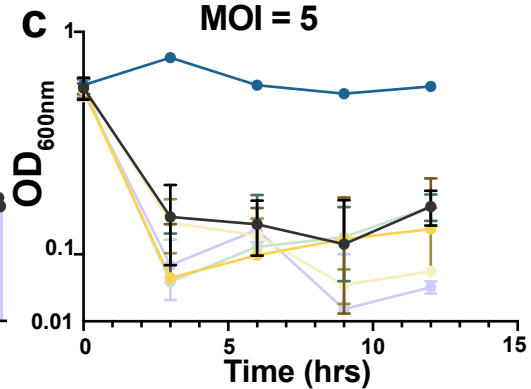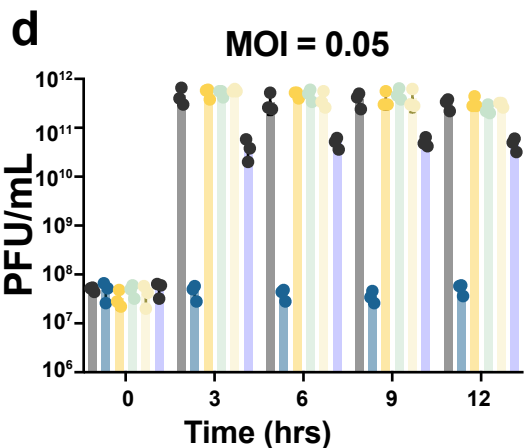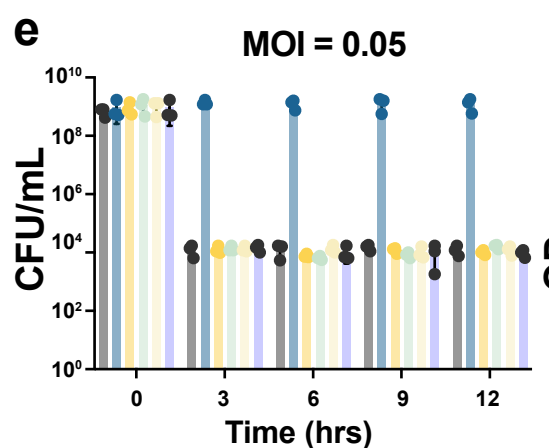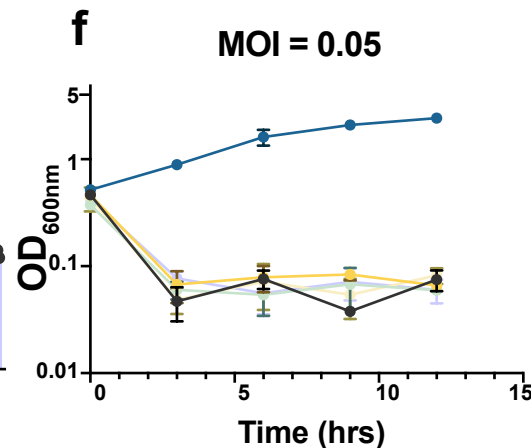

**Supplementary Figure 5. Native expression of Zorya II mediates population-wide immunity in response to phage infection.** *E. coli* MT56 harbouring empty vector (VC, pSUPROM) or the same vector carrying Zorya II or its mutants under the control of their native promoter as shown in panel **a-f** were infected with  $\phi$ phAvM at MOI 5 or 0.05. The **a,d**, titre (PFU/mL), **b,e**, cell counts (CFU/mL) and **c,f** the growth rate (OD<sub>600nm</sub>) of each culture was measured at several timepoints, as shown in panels **a-f**, over the course of 12 hrs post infection. For all panels, points show mean +/- SEM (n = 3 biological replicates).

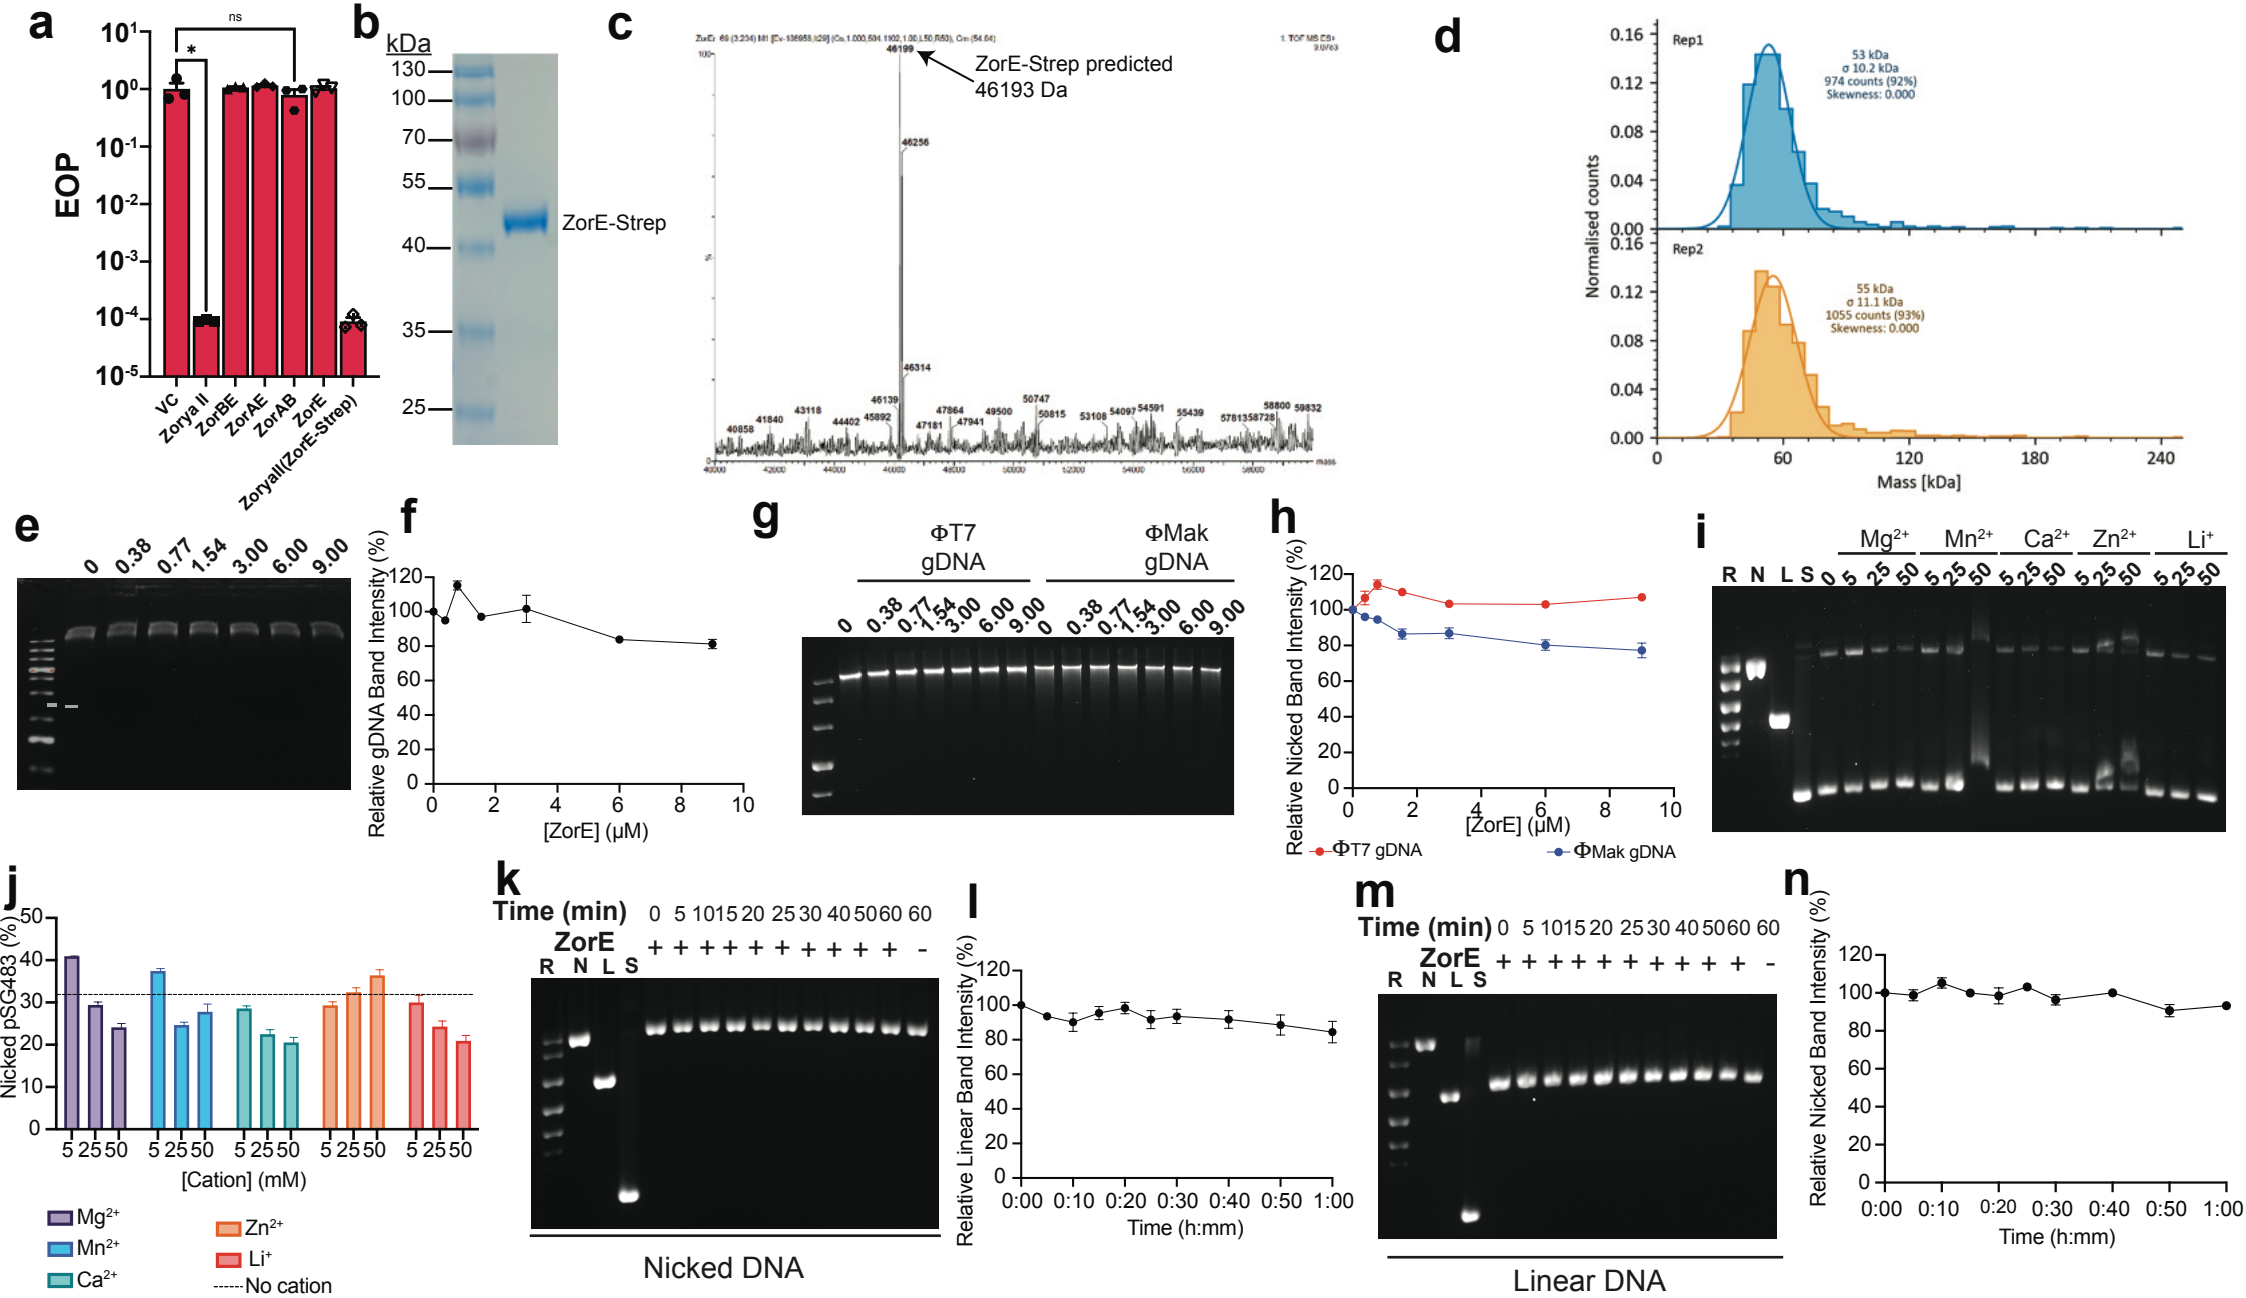



**Supplementary Figure 6. ZorE is a monomeric nickase with variable effects of metals.**

**a**, Efficiency of plating (EOP) measurement for *E. coli* MT56 carrying empty vector (VC, pGM39) or the same plasmid encoding Zorya II, ZorA II, ZorB II, ZorAB II, ZorE or ZorAll+ZorBII+ZorE-Strep when infected with  $\phi$ T7. **b**, SDS-PAGE of the final purified ZorE-Strep showing a single band at the expected size. **c**, Size exclusion chromatogram showing the expected elution volume of monomeric ZorE-Strep based on molecular weight (dashed line) and the peak collected for the final purified ZorE-Strep (blue). **d**, Mass photometry (Refeyn) for the ZorE-Strep sample shows a single population in solution representing monomeric ZorE-Strep. **e**, ZorE was titrated against constant *E. coli* MG1655 gDNA (200 ng). Reactions were incubated for 60 min at 37 °C in the presence of 5 mM  $Mg^{2+}$ . **f**, Densitometry analysis of nicking of *E. coli* MG1655 gDNA by ZorE as shown in **panel e**. **g**, ZorE was titrated against constant  $\phi$ T7 and  $\phi$ Mak gDNA (200 ng). Reactions were incubated for 60 min at 37 °C in the presence of 5 mM  $Mg^{2+}$ . **h**, Densitometry analysis of nicking of  $\phi$ T7 and  $\phi$ Mak gDNA by ZorE as shown in **panel g**. **i**, ZorE (768 nM) was incubated with supercoiled pSG483 plasmid DNA (6 nM) in presence of various metal cations. Cations were tested at 5, 25, and 50 mM. Reactions were incubated for 60 min at 37 °C. **j**, Densitometry analysis of nicking of pSG483 by ZorE in presence of various cations as shown in **panel i**. **k**, ZorE (768 nM) was incubated with linearised plasmid pSG483 (6 nM) at 37 °C for 0 to 60 min with 5 mM  $Mg^{2+}$ . **l**, Densitometry analysis of nicking of linear plasmid pSG483 by ZorE as shown in **panel k**. **m**, ZorE (768 nM) was incubated with nicked plasmid pSG483 (6 nM) at 37 °C for 0 to 60 min with 5 mM  $Mg^{2+}$ . **n**, Densitometry analysis of nicking of nicked plasmid pSG483 by ZorE as shown in **panel m**. For panels **e,g,i,k,m**, reactions were stopped by the addition of EDTA and SDS and products were analysed by gel electrophoresis in a 1x TAE, 1.4% agarose gel, post-stained with ethidium bromide. In all gels, control lanes represent forms of plasmid pSG483; R, relaxed (multiple topoisomers); N, nicked; L, linear; S, supercoiled. For panels **f,h,j,l,n** densitometry was performed using ImageJ (version 1.54g) with background subtracted and band intensity measured in triplicate. The percentage nicked, linear, and supercoiled pSG483 DNA of the total pSG483 DNA per lane was determined by calculating the average intensity ( $n = 3$ ) of each lanes' nicked, linear, and supercoiled bands, respectively. as a percentage of the total average intensity of all bands per lane. Relative band intensity was determined by normalising the average ( $n = 3$ ) intensity of the "0  $\mu$ M ZorE" lane to 100% and taking the average intensity of the subsequent lanes' bands as a percentage of the "0  $\mu$ M ZorE" lane. Error bars represent the standard error of the mean of triplicate data.

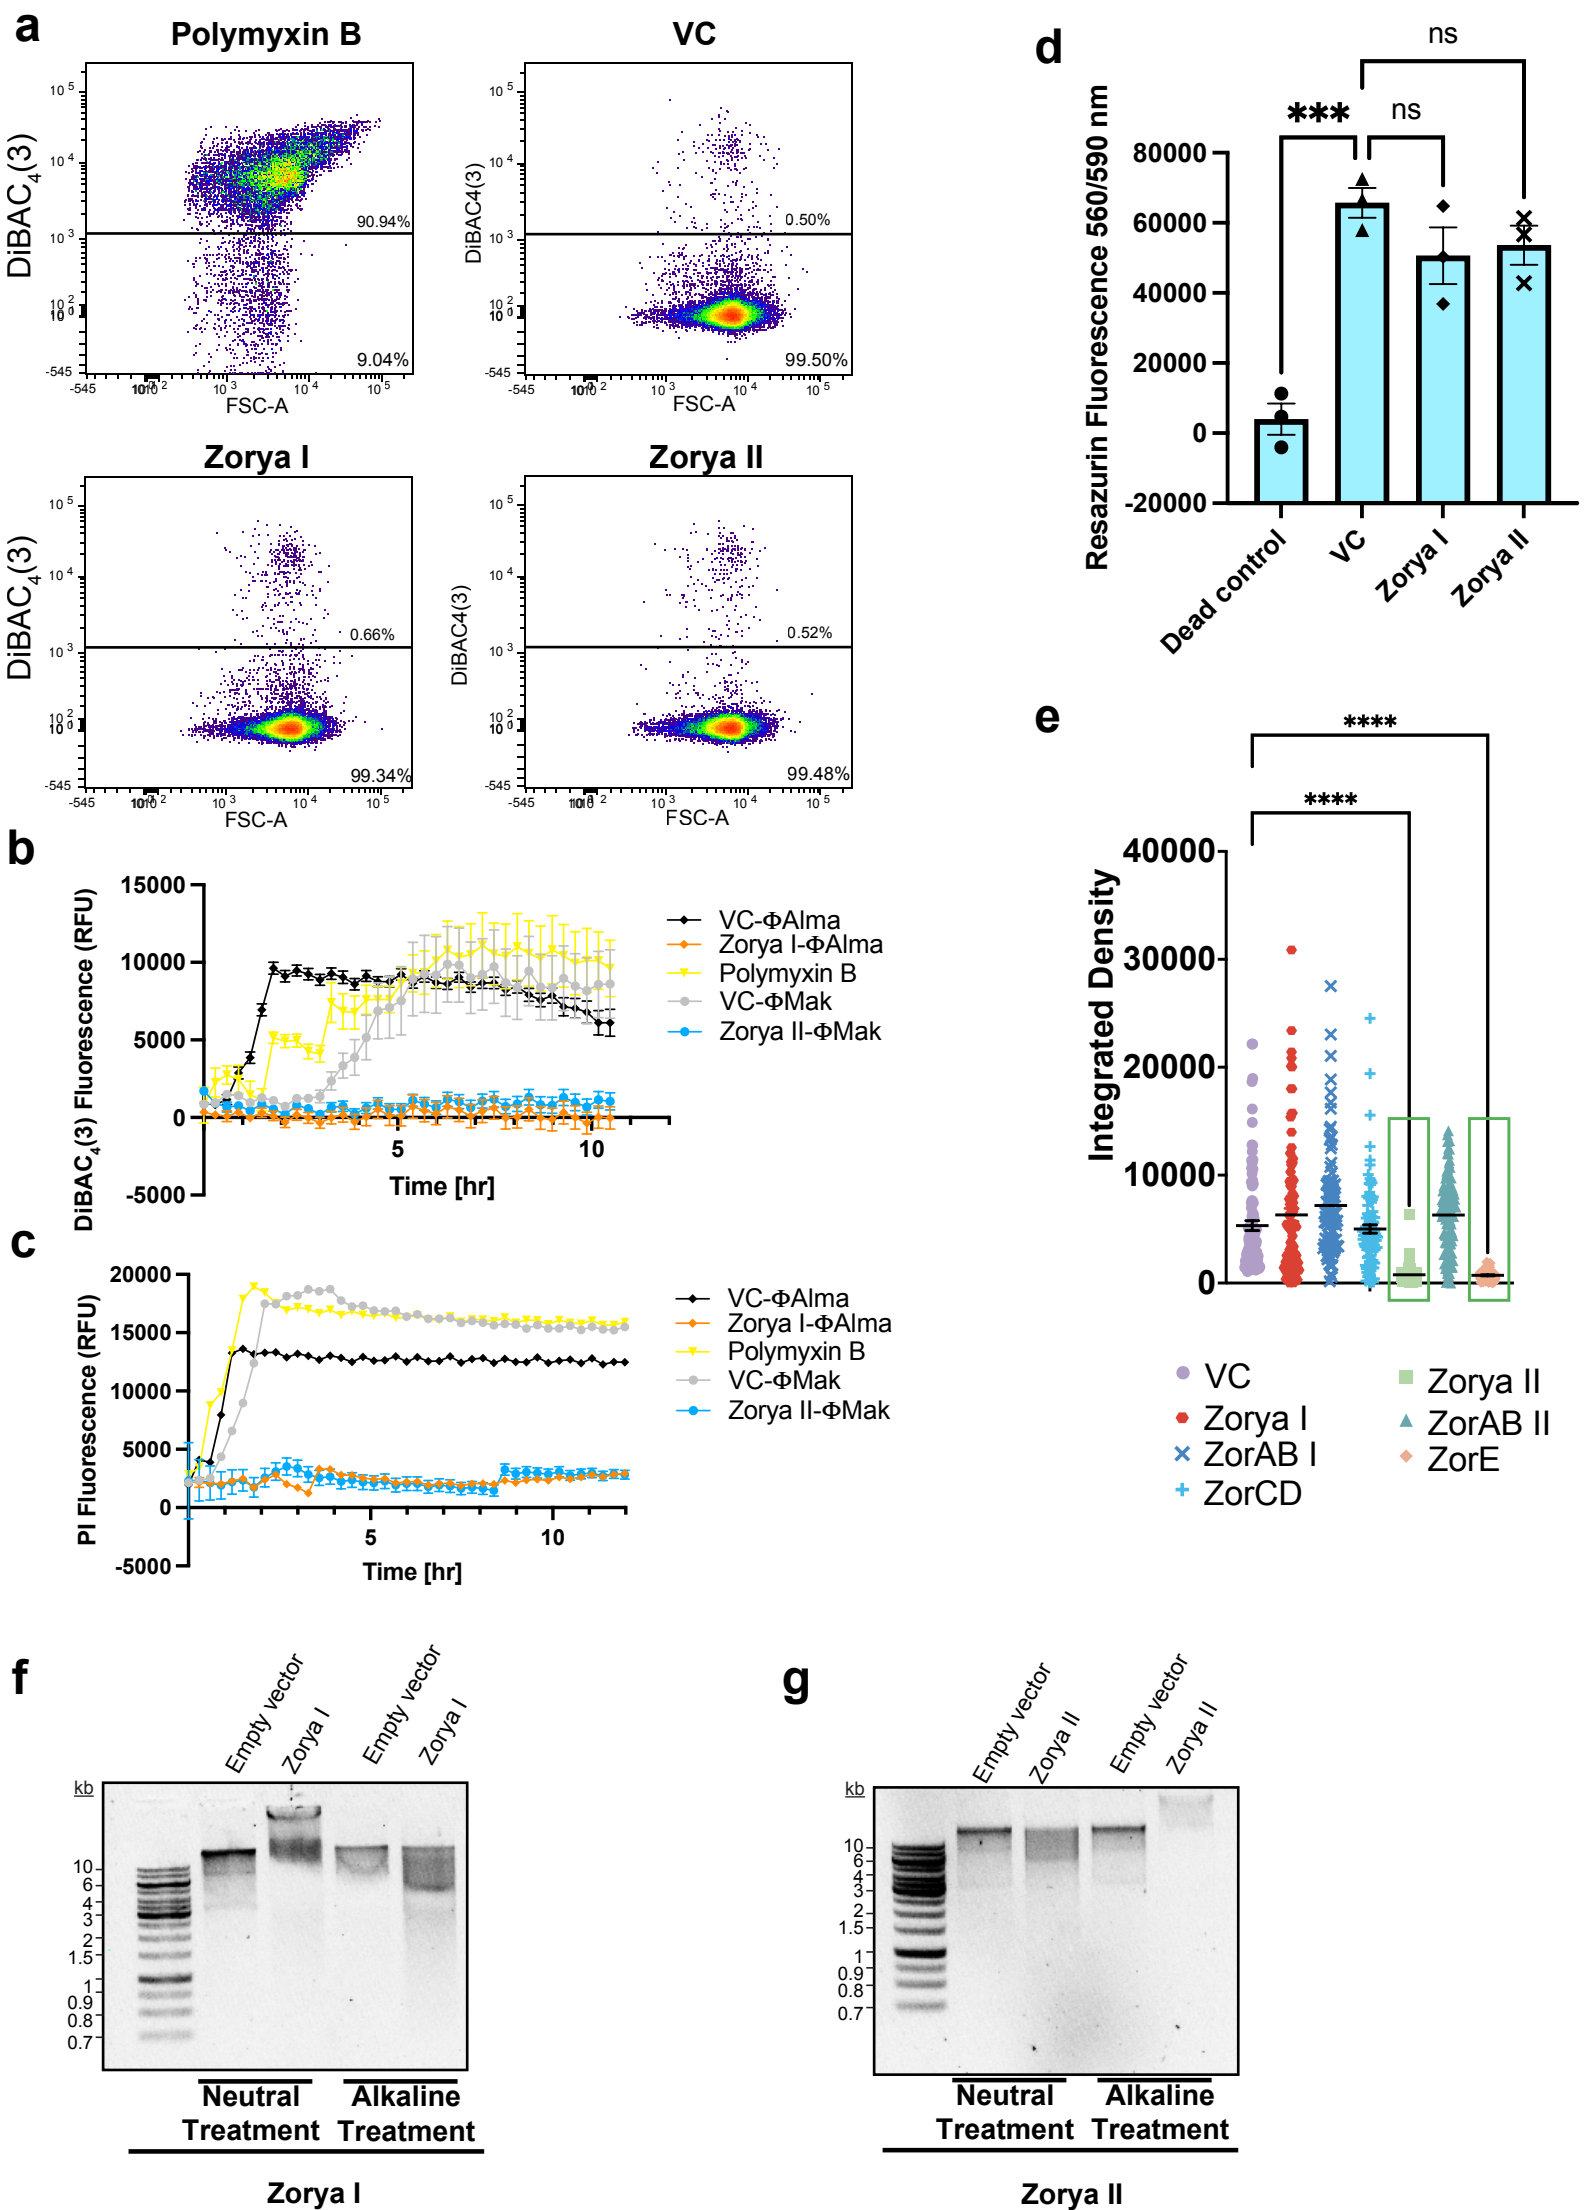

**Supplementary Figure 7. Zorya I and Zorya II do not alter the membrane potential and metabolism of cells.** **a**, Analysis of *E. coli* MT56 carrying empty vector (VC, pGM39) or the same plasmid encoding Zorya I or Zorya II by flow cytometry following induction with 0.2% L-Rhamnose. As a positive control, cells carrying VC were treated with 5 µg/mL of polymyxin B. Staining with DiBAC<sub>4</sub>(3) was used to assess loss of membrane potential. The image is representative of 3 independent experiments. **b-c**, Kinetic reads of **(b)** DiBAC<sub>4</sub>(3) fluorescence or **(c)** propidium iodide fluorescence for *E. coli* MT56 carrying empty vector (VC, pGM39) or a plasmid encoding Zorya I when infected with ϕAlma, or for cells harbouring VC or a plasmid encoding Zorya II when infected with ϕMak. Fluorescence was recorded every 20 min over the course of 12 hr. **d**, Strains as in **panel a-c**, were grown for 2 hrs at 37 °C in presence of 0.2% L-Rhamnose and subsequently treated with CellTiter Blue stain (Promega) to assess changes in their metabolism. Cells carrying VC were incubated 10 min at 100 °C as a positive control. Changes in the metabolism of each sample was assessed by measuring the ratio fluorescence at 560nm and at 590nm. For panels **b-d**, points show mean +/- SEM (n = 3 biological replicates). **e**, Quantification of the integrated density (sum of pixel values over single-cells area) for DAPI staining in Figure **5g**. The integrated density was quantified using Fiji. Point show mean +/- SEM (n = 100 cells). Statistical analysis was performed using non-parametric Kruskal-Wallis Test in GraphPad 9. Significance was reported as p ≤ 0.05. **f-g** *E. coli* MT56 harbouring empty vector (VC, pGM39) or the same plasmid encoding Zorya I or Zorya II were grown until exponential phase and then infected with MOI 0.1 of ϕAlma (**f**) or ϕT7 (**g**). Cells were retrieved after first burst event and total genomic DNA extracted. Genomic DNA was subjected to neutral and alkaline treatment, as described in Material and Methods, and subjected to electrophoretic analysis. For panels **f-g**, images are representative of three independent experiments.

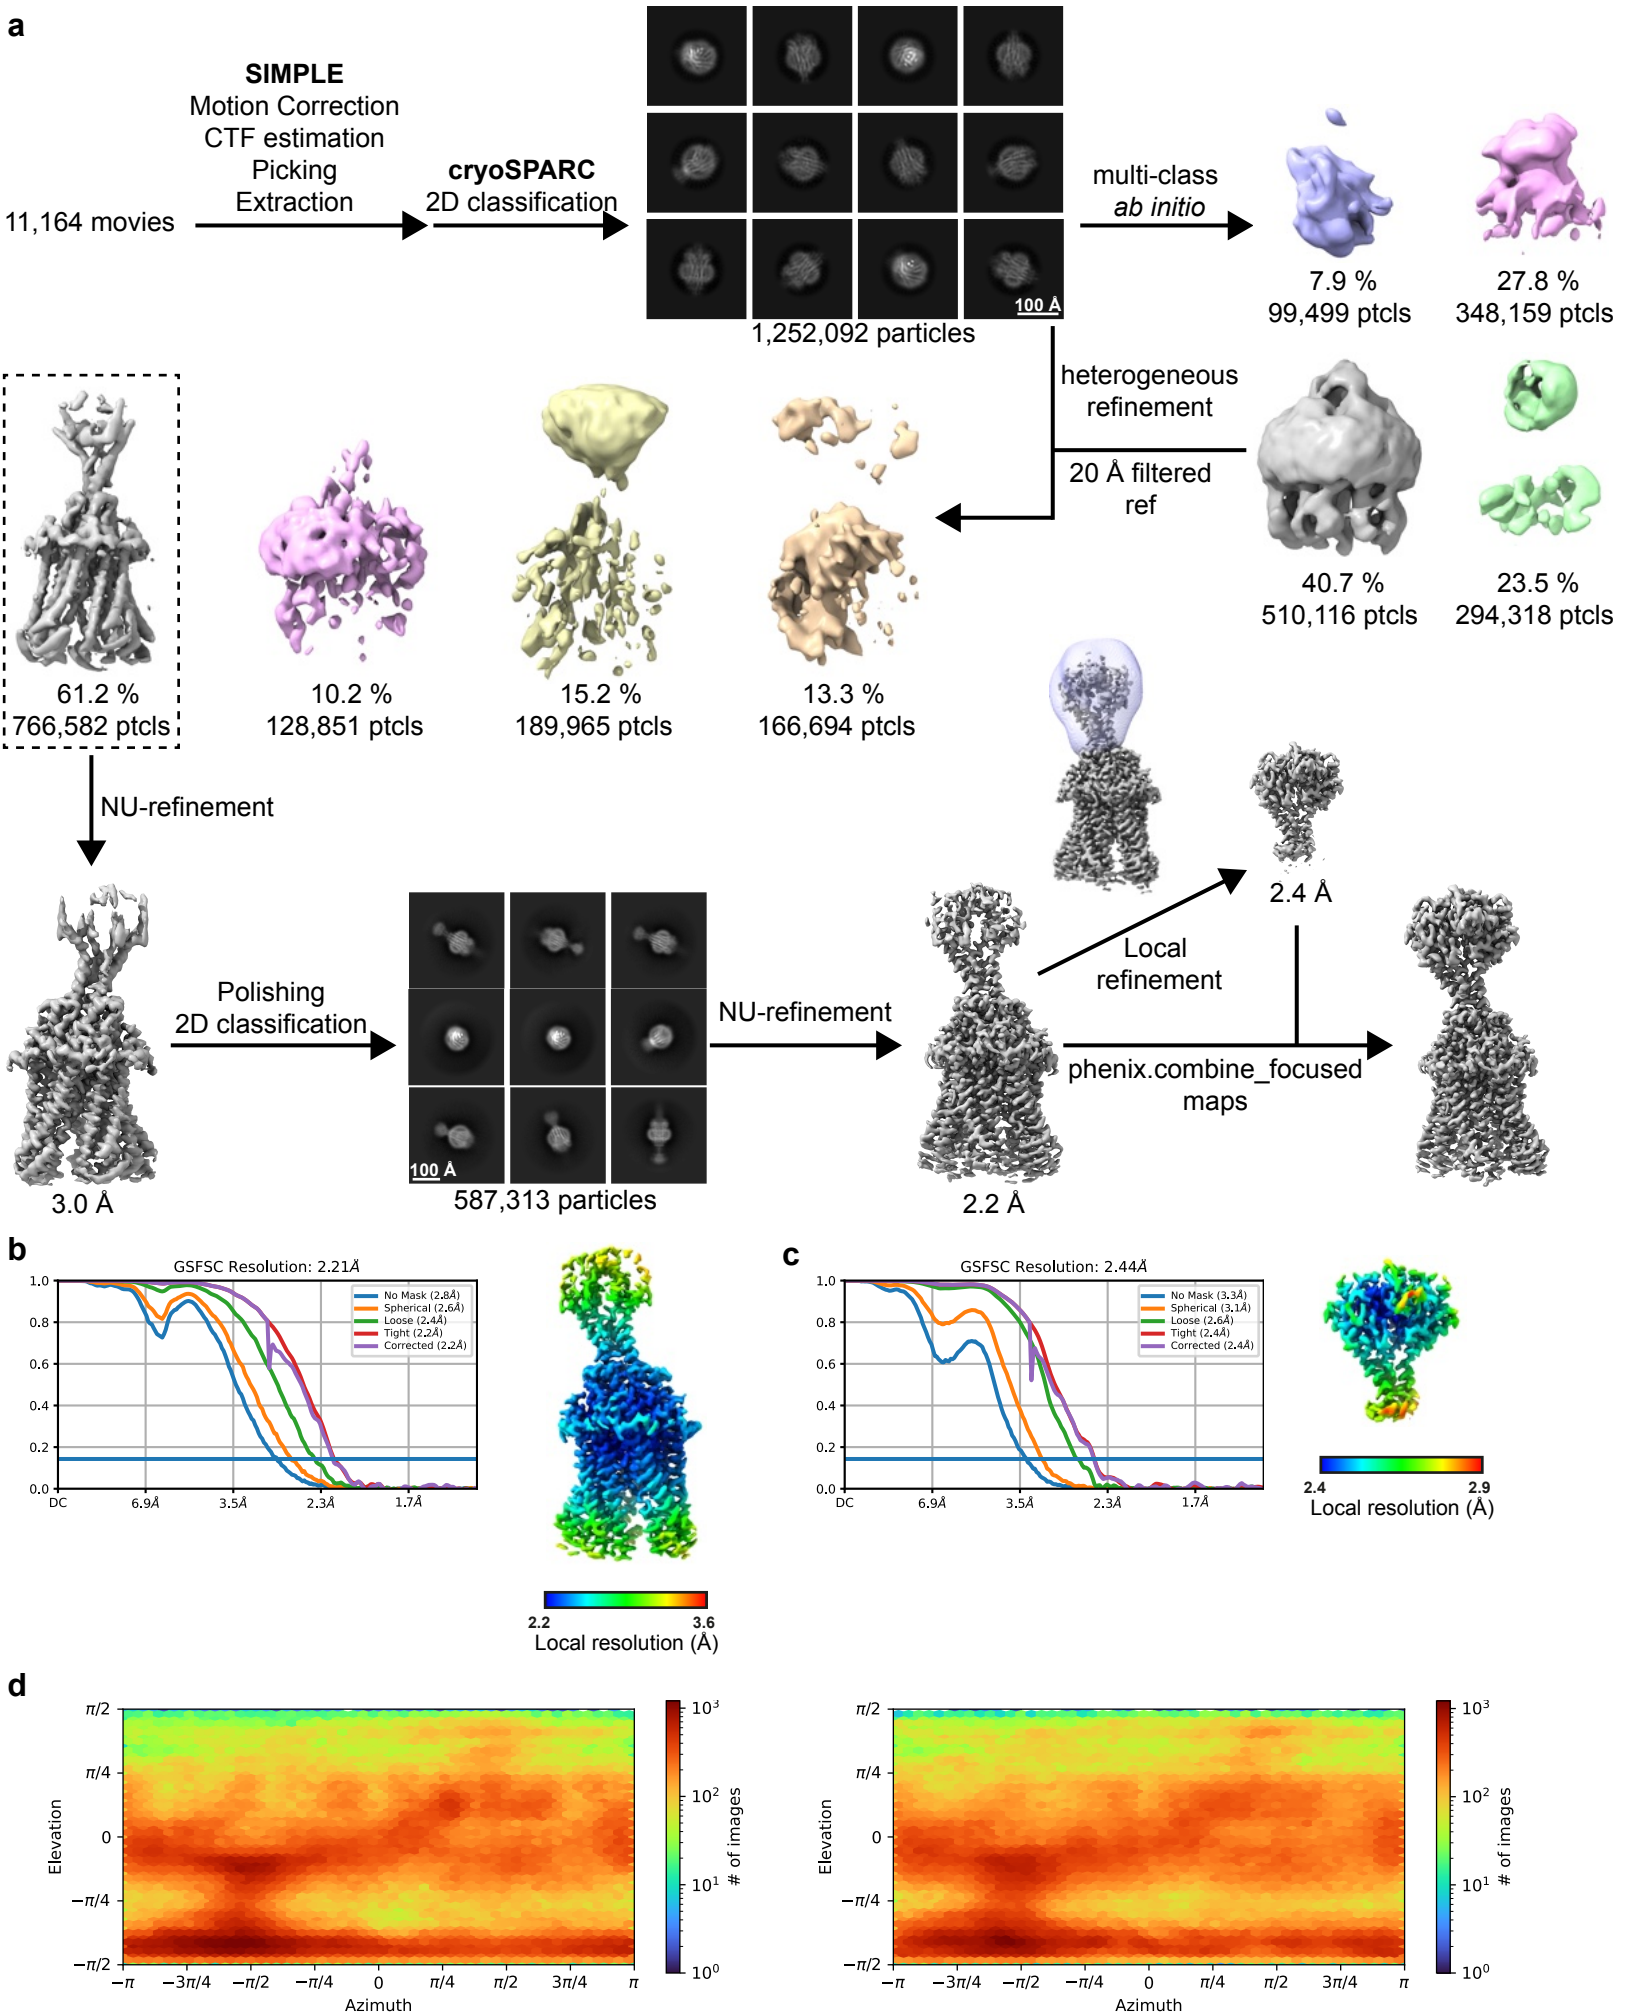

**Supplementary Figure 8. Cryo-EM processing workflow of *Shewanella* sp. strain ANA-3 type I ZorA<sub>5</sub>B<sub>2</sub> complex with local and global resolution estimates.** **a**, Image processing workflow. **b**, Left, gold-standard FSC curves used for global-resolution estimate of the consensus volume as calculated within cryoSPARC. Right, local resolution estimate of the consensus volume as determined within Relion. **c**, Left, Gold-standard FSC curves used for global-resolution estimate of the ZorB peptidoglycan-binding domain dimer volume, derived from local refinement, as calculated within cryoSPARC. Right, local resolution estimate of the peptidoglycan-binding domain volume, derived from local refinement, as determined within Relion. **d**, angular distribution plot of the consensus (left) or peptidoglycan-binding domain (right) particle sets.

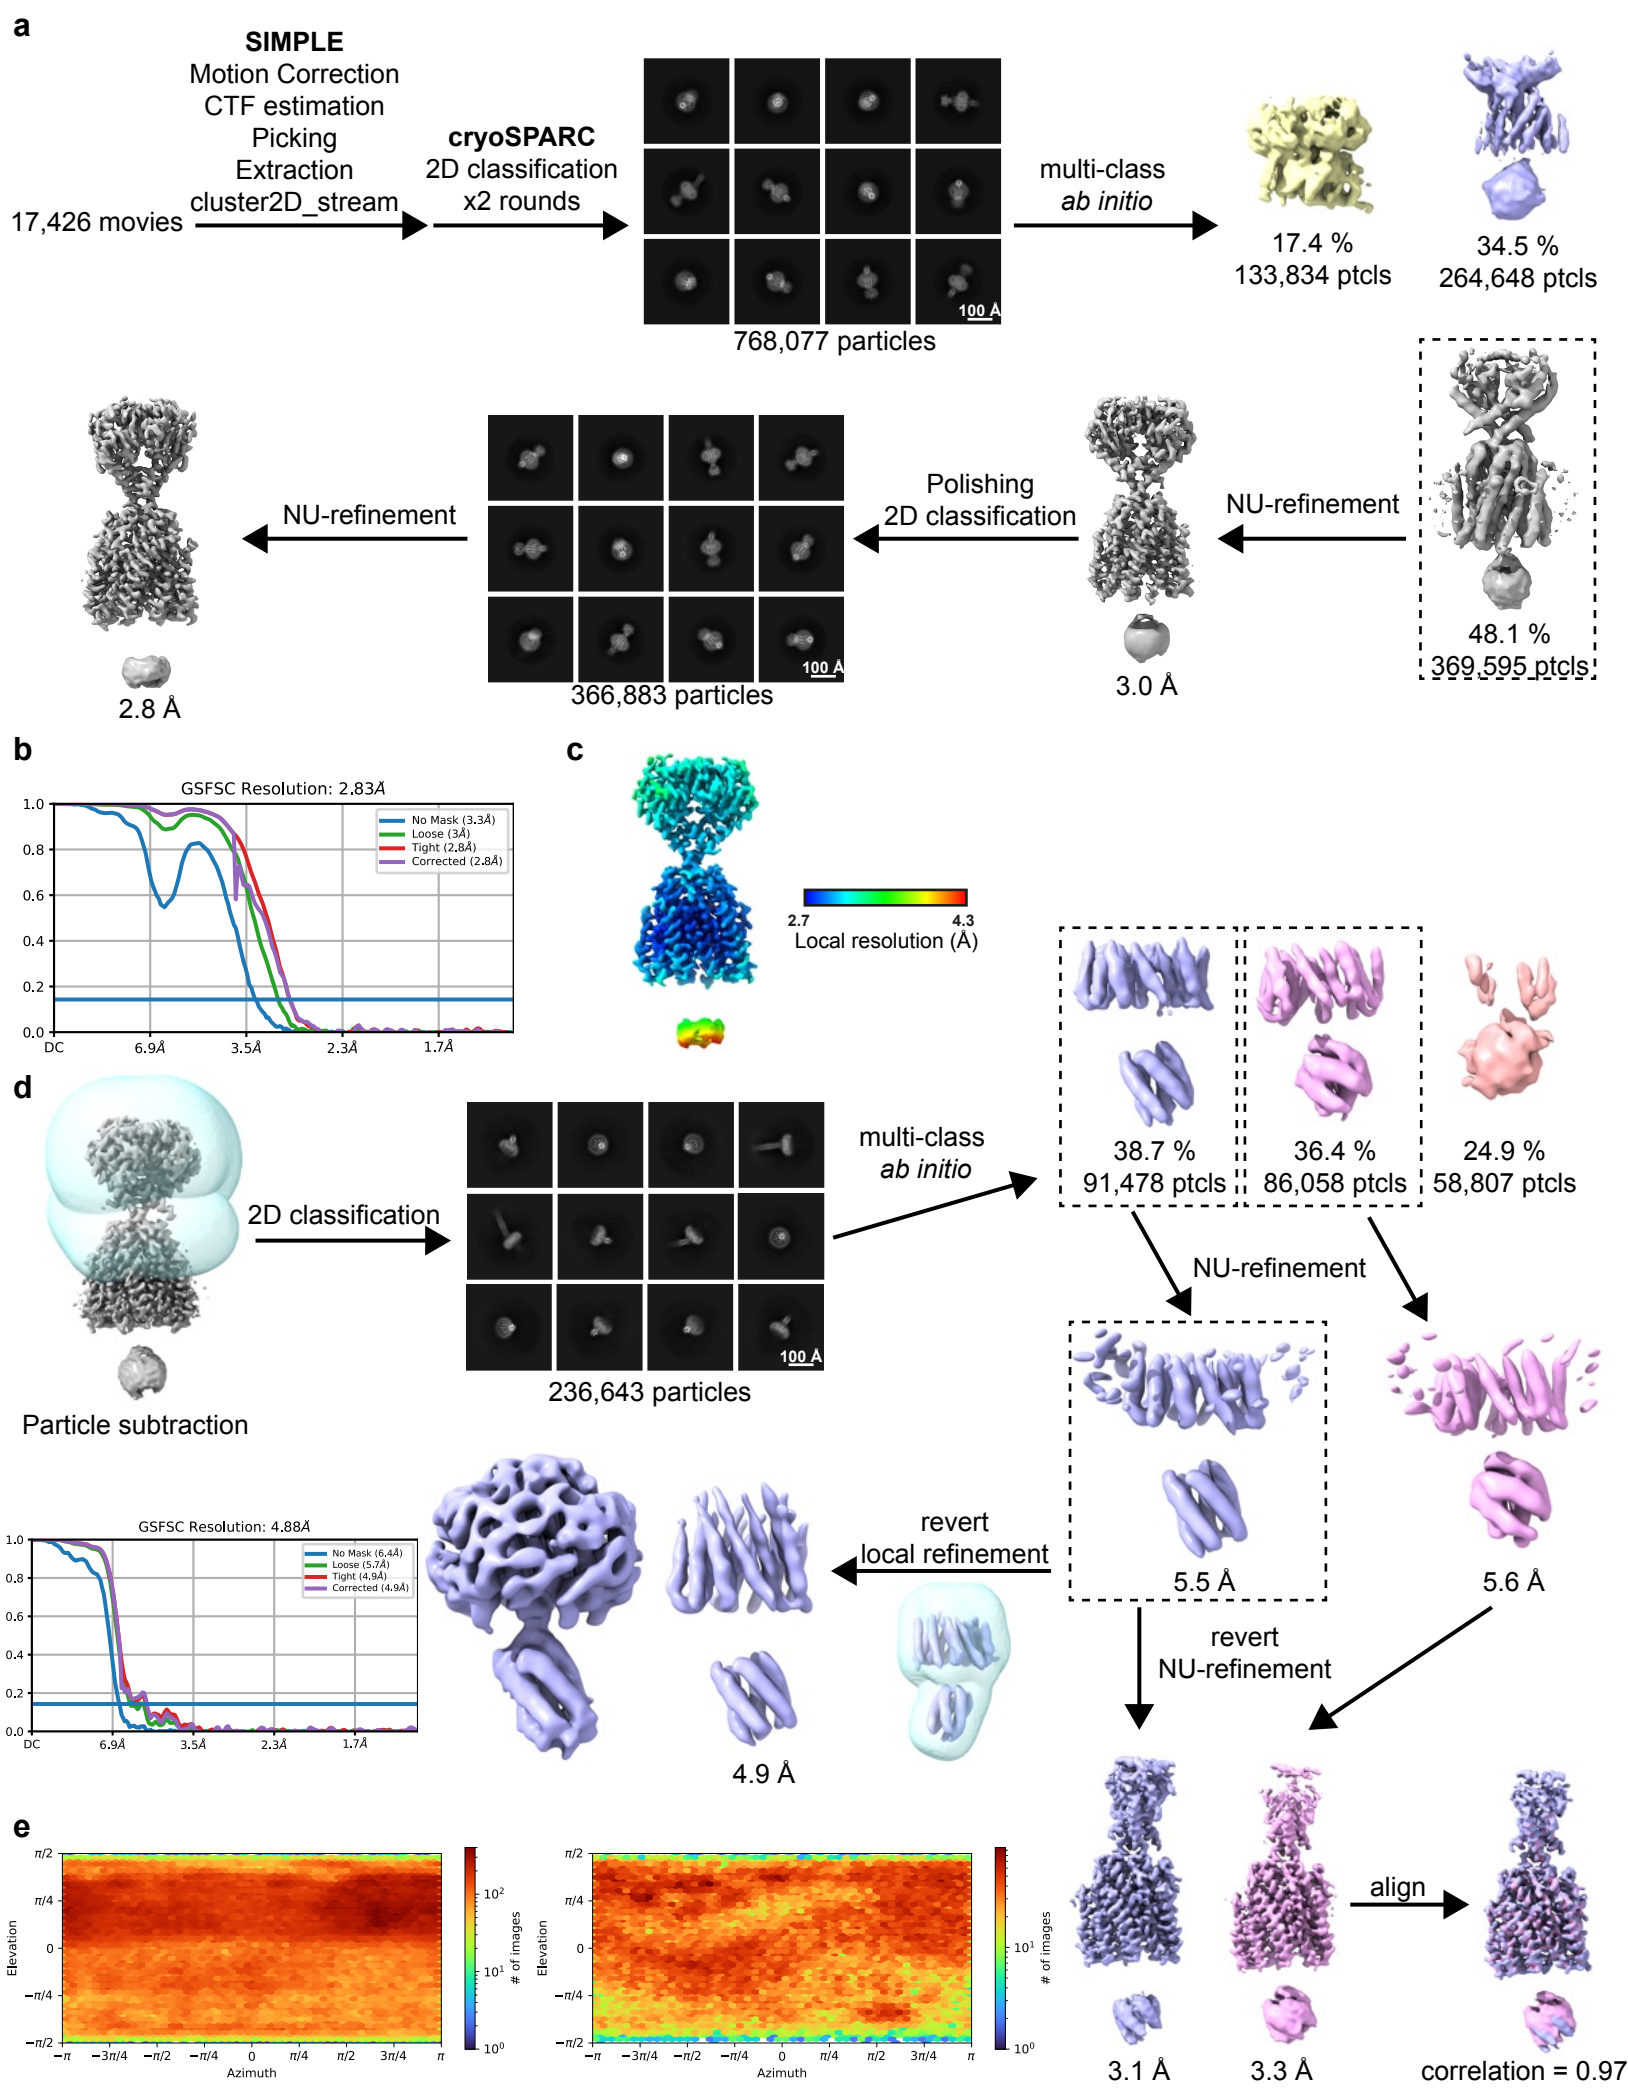

**Supplementary Figure 9. Cryo-EM processing workflow of *Sulfuricurvum kujiense* type II ZorA<sub>5</sub>B<sub>2</sub> complex with local and global resolution estimates.****a**, Image processing workflow. **b**, Gold-standard FSC curves used for global-resolution estimate as calculated within cryoSPARC. **c**, Local resolution estimate as determined within Relion. **d**, Additional processing steps used to improved density for the cytoplasmic extensions of *S. kujiense* ZorAB. **e**, angular distribution plot of the full complex (left) or cytoplasmic extension focused (right) particle sets.



**a**  
(i)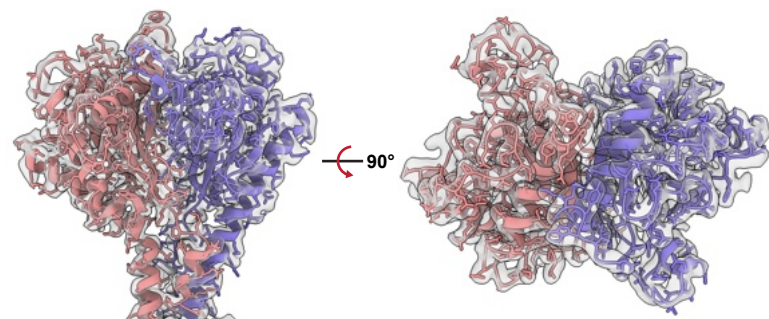

(ii)

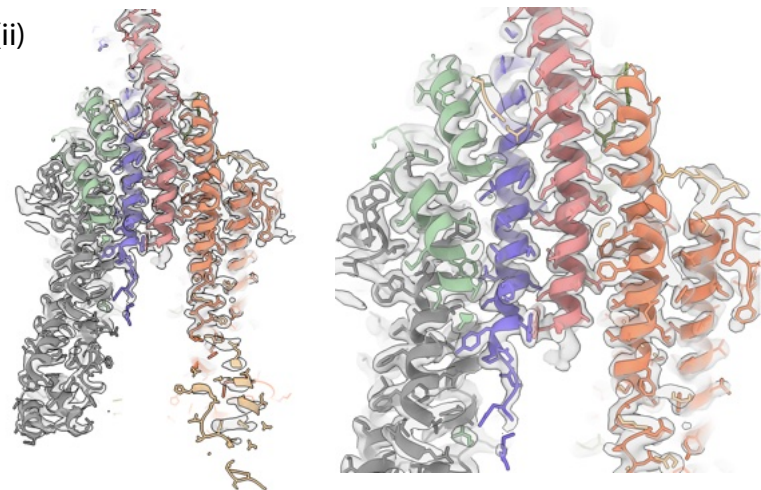

(iii)

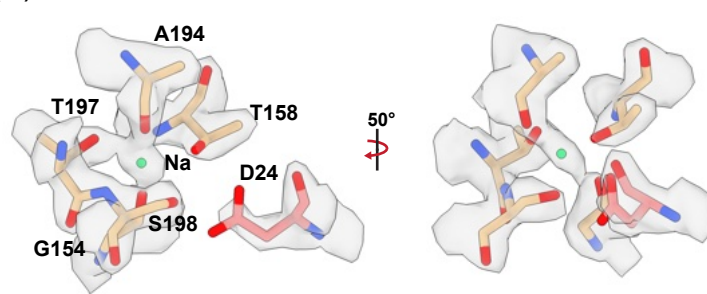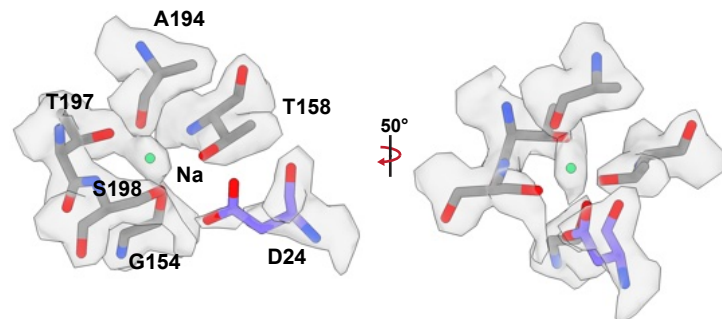**b**

(i)

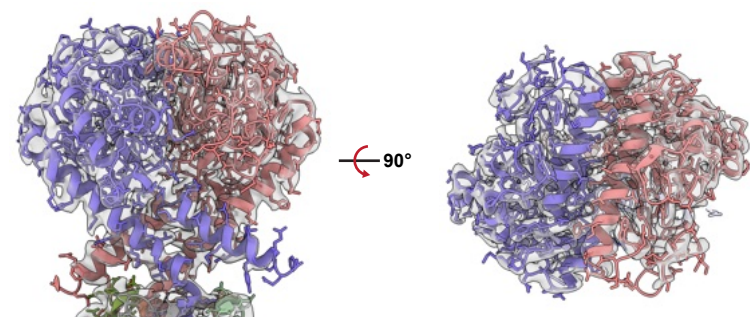

(ii)

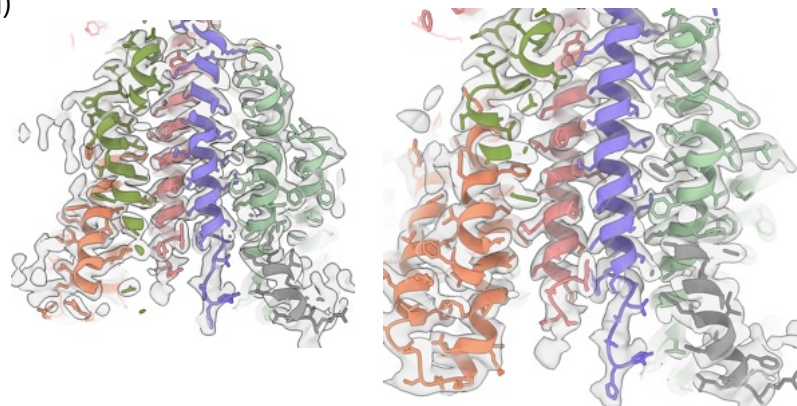

**Supplementary Figure 10. Model-to-map fits of key structural elements.****a**, Model overlayed with density for *Shewanella* sp. strain ANA-3 type I ZorA<sub>5</sub>B<sub>2</sub> complex, depicting (i) the ZorB peptidoglycan-binding domain (composite map; contour level of 10.8), (ii) a slice through of the core complex shown at lower (left) or higher (right) magnification (composite map; contour level of 10.8) or (iii) the sodium-binding sites (left, site 1; right, site 2) at two viewing angles (sharpened map; contour level of 1.22). **b**, Model overlayed with density for *Sulfuricurvum kujiense* type II ZorA<sub>5</sub>B<sub>2</sub> complex, depicting (i) the ZorB peptidoglycan-binding domain or (ii) a slice through of the core complex shown at lower (left) or higher (right) magnification (all depictions used a map contour level of 0.25)

**Supplementary Table 1.** Strains and plasmids used in this study

| Name                              | Description                                                                                                                                                                                                          | Reference           |
|-----------------------------------|----------------------------------------------------------------------------------------------------------------------------------------------------------------------------------------------------------------------|---------------------|
| <b><u>Strains</u></b>             |                                                                                                                                                                                                                      |                     |
| <b><i>Escherichia coli</i></b>    |                                                                                                                                                                                                                      |                     |
| Mt56(DE3)                         | BL21(DE3) derivative optimised for expression of membrane proteins                                                                                                                                                   | <sup>1</sup>        |
| DH5α                              | Cloning strain, F– $\phi$ 80lacZΔM15 Δ(lacZYA-argF)U169 recA1 endA1 hsdR17(rK–, mK+) phoA supE44 λ–thi-1 gyrA96 relA1                                                                                                | New England Biolabs |
| <b><i>Serratia marcescens</i></b> |                                                                                                                                                                                                                      |                     |
| <b><i>Serratia marcescens</i></b> |                                                                                                                                                                                                                      |                     |
| <i>S. marcescens</i> ATCC 274     | <i>S. marcescens</i> strain ATCC 274                                                                                                                                                                                 | NCTC                |
| <b>Plasmids</b>                   |                                                                                                                                                                                                                      |                     |
| pT12-ecMotAB                      | Rhamnose-inducible expression vector (Kn <sup>R</sup> ); carrying the coding sequence for MotAB from <i>E. coli</i> W. A TEV cleavage site and 2xStrepII tag are encoded directly downstream and in-frame with MotB. | <sup>2</sup>        |
| pGM39                             | Rhamnose-inducible expression vector (Kn <sup>R</sup> ) where the ecMotAB-TEV-2xStrepII tag insert has been deleted by KLD, to leave an empty multiple cloning site.                                                 |                     |
| pGM15                             | Coding sequence of ZorAB II from <i>Sulfuricurvum kujiense</i> DSM 16994 (SULKU_RS11880 and SULKU_RS11885) in                                                                                                        | This study          |

|       |                                                                                                                                                                                            |            |
|-------|--------------------------------------------------------------------------------------------------------------------------------------------------------------------------------------------|------------|
|       | pT12-derived plasmid. Insert was cloned in pT12-ecMotAB to replace ecMotAB and in frame with the TEV site and 2xStrepII tag                                                                |            |
| pGM99 | Coding sequence of Zorya I operon from <i>Shewanella</i> sp. ANA-3 (SHEWANA3_RS19785 SHEWANA3_RS19790 and SHEWANA3_RS19795) in pGM39                                                       | This study |
| pGM54 | Coding sequence of ZorAB I from <i>Shewanella</i> sp. ANA-3 in pT12-derived plasmid. Insert was cloned in pT12-ecMotAB to replace ecMotAB and in frame with the TEV site and 2xStrepII tag | This study |
| pGM23 | Coding sequence of Zorya II operon from <i>E. coli</i> ATCC 8739 (ECOLC_RS20900, ECOLC_RS20905 and ECOLC_RS20910) in pGM39                                                                 | This study |
| pGM35 | Coding sequence of ZorBE operon from <i>E. coli</i> ATCC 8739 (ECOLC_RS20900, ECOLC_RS20905 and ECOLC_RS20910) in pGM39                                                                    | This study |
| pGM36 | Coding sequence of ZorAE operon from <i>E. coli</i> ATCC 8739 (ECOLC_RS20900, ECOLC_RS20905 and ECOLC_RS20910) in pGM39                                                                    | This study |
| pGM37 | Coding sequence of ZorE from <i>E. coli</i> ATCC 8739 in pGM39                                                                                                                             | This study |
| pGM38 | Coding sequence of ZorAB II from <i>E. coli</i> ATCC 8739 in pGM39                                                                                                                         | This study |

|        |                                                                                                                                                      |            |
|--------|------------------------------------------------------------------------------------------------------------------------------------------------------|------------|
| pGM46  | Coding sequence of Zorya II from <i>E. coli</i> ATCC 8739 in pGM39, with ZorB II carrying a D24N mutation.                                           | This study |
| pGM55  | Coding sequence of Zorya II from <i>E. coli</i> ATCC 8739 in pGM39, with ZorA II carrying a deletion from aa106 to aa550(cytoplasmic domain)         | This study |
| pGM56  | Coding sequence of Zorya II from <i>E. coli</i> ATCC 8739 in pGM39, with ZorB II carrying a deletion from aa45 to aa235 (periplasmic domain)         | This study |
| pGM70  | Coding sequence of Zorya I from <i>S. marcescens</i> ATCC 274(SMATCC274_RS21230, SMATCC274_RS21235 SMATCC274_RS21240 and SMATCC274_RS21245) in pGM39 | This study |
| pGM85  | Coding sequence of ZorCD from <i>S. marcescens</i> ATCC 274 in pGM39                                                                                 | This study |
| pGM86  | Coding sequence of ZorAB I from <i>S. marcescens</i> ATCC 274 in pGM39                                                                               | This study |
| pGM124 | Coding sequence of ZorABC from <i>S. marcescens</i> ATCC 274 in pGM39                                                                                | This study |
| pGM125 | Coding sequence of ZorBCD from <i>S. marcescens</i> ATCC 274 in pGM39                                                                                | This study |
| pGM140 | Coding sequence of Zorya I <i>S. marcescens</i> ATCC 274 in pGM39, with ZorB I carrying a deletion a D24N mutation                                   | This study |
| pGM141 | Coding sequence of ZorABD from <i>S. marcescens</i> ATCC 274 in pGM39                                                                                | This study |
| pGM142 | Coding sequence of ZorACD from <i>S. marcescens</i> ATCC 274 in pGM39                                                                                | This study |

|        |                                                                                                                                             |            |
|--------|---------------------------------------------------------------------------------------------------------------------------------------------|------------|
| pGM223 | Coding sequence of Zorya I <i>S. marcescens</i> ATCC 274 in pGM39, with ZorA I carrying a deletion from aa237 to aa678 (cytoplasmic domain) | This study |
| pGM224 | Coding sequence of Zorya I <i>S. marcescens</i> ATCC 274 in pGM39, with ZorB I carrying a deletion from aa43 to aa287 (periplasmic domain)  | This study |
| pGM59  | Coding sequence of Zorya II <i>Klebsiella oxytoca</i> 571.31(G0D99_RS19745, G0D99_RS19740 and G0D99_RS19735) in pGM39                       | This study |
| pGM60  | Coding sequence of Zorya II <i>Legionella</i> <i>lansingensis</i> NCTC12830 (CKV79_RS08030, CKV79_RS08025 and CKV79_RS08020) in pGM39       | This study |
| pGM61  | Coding sequence of Zorya II <i>S. marcescens</i> UMH9 (BVG96_RS22930, BVG96_RS22925 and BVG96_RS22920) in pGM39                             | This study |
| pGM62  | Coding sequence of Zorya II <i>E. coli</i> KTE66 in pGM39                                                                                   | This study |
| pGM63  | Coding sequence of Zorya II <i>Pseudomonas</i> <i>jinjuensis</i> NBRC10347 in pGM39                                                         | This study |
| pGM64  | Coding sequence of Zorya II <i>S. marcescens</i> strain AS012322 in pGM39                                                                   | This study |
| pGM65  | Coding sequence of Zorya II <i>Shewanella</i> <i>bicestrii</i> strain JAB-1(CF168_RS11660, CF168_RS11655 and CF168_RS11650) in pGM39        | This study |
| pGM94  | Coding sequence of ZorCD from <i>S. marcescens</i> ATCC 274 cloned downstream of ZorAB II (from <i>S. marcescens</i> UMH9) in pGM39         | This study |

|        |                                                                                                                 |            |
|--------|-----------------------------------------------------------------------------------------------------------------|------------|
| pGM98  | Coding sequence of ZorAB I from <i>S. marcescens</i> ATCC 274 and ZorE from <i>S. marcescens</i> UMH9) in pGM39 | This study |
| pGM143 | Coding sequence of Zorya II <i>E.coli</i> ATCC 8739 in pGM39, with ZorA II carrying a A210P mutation            | This study |
| pGM144 | Coding sequence of Zorya II <i>E.coli</i> ATCC 8739 in pGM39, with ZorA II carrying a V237A mutation            | This study |
| pGM145 | Coding sequence of Zorya II <i>E.coli</i> ATCC 8739 in pGM39, with ZorA II carrying a Q244A mutation            | This study |
| pGM146 | Coding sequence of Zorya II <i>E.coli</i> ATCC 8739 in pGM39, with ZorA II carrying a I282A mutation            | This study |
| pGM147 | Coding sequence of Zorya II <i>E.coli</i> ATCC 8739 in pGM39, with ZorA II carrying a T309A mutation            | This study |
| pGM148 | Coding sequence of Zorya II <i>E.coli</i> ATCC 8739 in pGM39, with ZorA II carrying a L346A mutation            | This study |
| pGM149 | Coding sequence of Zorya II <i>E.coli</i> ATCC 8739 in pGM39, with ZorA II carrying a E366A mutation            | This study |
| pGM150 | Coding sequence of Zorya II <i>E.coli</i> ATCC 8739 in pGM39, with ZorA II carrying a E402A mutation            | This study |



|        |                                                                                                      |            |
|--------|------------------------------------------------------------------------------------------------------|------------|
| pGM152 | Coding sequence of Zorya II <i>E.coli</i> ATCC 8739 in pGM39, with ZorB II carrying a E139A mutation | This study |
| pGM153 | Coding sequence of Zorya II <i>E.coli</i> ATCC 8739 in pGM39, with ZorB II carrying a H141A mutation | This study |
| pGM154 | Coding sequence of Zorya II <i>E.coli</i> ATCC 8739 in pGM39, with ZorB II carrying a T142A mutation | This study |
| pGM155 | Coding sequence of Zorya II <i>E.coli</i> ATCC 8739 in pGM39, with ZorB II carrying a S143A mutation | This study |
| pGM156 | Coding sequence of Zorya II <i>E.coli</i> ATCC 8739 in pGM39, with ZorB II carrying a D145A mutation | This study |
| pGM157 | Coding sequence of Zorya II <i>E.coli</i> ATCC 8739 in pGM39, with ZorB II carrying a K188A mutation | This study |
| pGM158 | Coding sequence of Zorya II <i>E.coli</i> ATCC 8739 in pGM39, with ZorB II carrying a Y196A mutation | This study |
| pGM159 | Coding sequence of Zorya II <i>E.coli</i> ATCC 8739 in pGM39, with ZorB II carrying a R215A mutation | This study |
| pGM160 | Coding sequence of Zorya II <i>E.coli</i> ATCC 8739 in pGM39, with ZorB II carrying a I232A mutation | This study |

|        |                                                                                                         |            |
|--------|---------------------------------------------------------------------------------------------------------|------------|
| pGM161 | Coding sequence of Zorya I <i>S. marcescens</i> ATCC274 in pGM39, with ZorA I carrying a E267A mutation | This study |
| pGM162 | Coding sequence of Zorya I <i>S. marcescens</i> ATCC274 in pGM39, with ZorA I carrying a A280P mutation | This study |
| pGM163 | Coding sequence of Zorya I <i>S. marcescens</i> ATCC274in pGM39, with ZorA I carrying a S302P mutation  | This study |
| pGM164 | Coding sequence of Zorya I <i>S. marcescens</i> ATCC274 in pGM39, with ZorA I carrying a S319A mutation | This study |
| pGM165 | Coding sequence of Zorya I <i>S. marcescens</i> ATCC274 in pGM39, with ZorA I carrying a L361A mutation | This study |
| pGM166 | Coding sequence of Zorya I <i>S. marcescens</i> ATCC274 in pGM39, with ZorA I carrying a Q392A mutation | This study |
| pGM167 | Coding sequence of Zorya I <i>S. marcescens</i> ATCC274in pGM39, with ZorA I carrying a L423A mutation  | This study |
| pGM168 | Coding sequence of Zorya I <i>S. marcescens</i> ATCC274in pGM39, with ZorA II carrying a K444A mutation | This study |
| pGM169 | Coding sequence of Zorya I <i>S. marcescens</i> ATCC274in pGM39, with ZorA I carrying a E481A mutation  | This study |

|        |                                                                                                                                     |            |
|--------|-------------------------------------------------------------------------------------------------------------------------------------|------------|
| pGM170 | Coding sequence of Zorya I <i>S. marcescens</i> ATCC274 in pGM39, with ZorA I carrying a A520P mutation                             | This study |
| pGM171 | Coding sequence of Zorya I <i>S. marcescens</i> ATCC274 in pGM39, with ZorA I carrying a S598A mutation                             | This study |
| pGM172 | Coding sequence of Zorya I <i>S. marcescens</i> ATCC274in pGM39, with ZorA I carrying a Y631A mutation                              | This study |
| pGM173 | Coding sequence of Zorya I <i>S. marcescens</i> ATCC274in pGM39, with ZorA I carrying a V664A mutation                              | This study |
| pGM176 | Coding sequence of Zorya I <i>S. marcescens</i> ATCC274 in pGM39, with ZorB I carrying a H186A mutation                             | This study |
| pGM180 | Coding sequence of Zorya I <i>S. marcescens</i> ATCC274in pGM39, with ZorB II carrying a L199A mutation                             | This study |
| pGM181 | Coding sequence of Zorya I <i>S. marcescens</i> ATCC274 in pGM39, with ZorB II carrying a R203A mutation                            | This study |
| pGM183 | Coding sequence of Zorya I <i>S. marcescens</i> ATCC274 in pGM39, with ZorB II carrying a R254A mutation                            | This study |
| pGM185 | Coding sequence of Zorya I <i>S. marcescens</i> ATCC274 in pGM39, with ZorB II carrying a R259A mutation                            | This study |
| pGM29  | Coding sequence of ZorE from <i>E. coli</i> ATCC 8739 in pT12-derived plasmid. Insert was cloned in pT12-ecMotAB to replace ecMotAB | This study |

|        |                                                                                                                                                                                                               |            |
|--------|---------------------------------------------------------------------------------------------------------------------------------------------------------------------------------------------------------------|------------|
|        | and in frame with the TEV site and 2xStrepII tag                                                                                                                                                              |            |
| pGM287 | Coding sequence of ZorBI <sub>165-287</sub> from <i>S. marcescens</i> ATCC 274 in pT12-derived plasmid. Insert was cloned in pT12-ecMotAB to replace ecMotAB and in frame with the TEV site and 2xStrepII tag | This study |
| pGM288 | Coding sequence of ZorBII <sub>115-235</sub> from <i>E. coli</i> ATCC 8739 in pT12-derived plasmid. Insert was cloned in pT12-ecMotAB to replace ecMotAB and in frame with the TEV site and 2xStrepII tag     | This study |
| pGM301 | Coding sequence of ZorBII <sub>115-235</sub> carrying the S143A point mutation. Plasmid derived from pGM288.                                                                                                  | This study |
| pGM304 | Coding sequence of ZorBII <sub>115-235</sub> carrying the R215A point mutation. Plasmid derived from pGM288.                                                                                                  | This study |
| pGM306 | Coding sequence of ZorBI <sub>165-287</sub> carrying the L199A point mutation. Plasmid derived from pGM287.                                                                                                   | This study |
| pGM307 | Coding sequence of ZorBI <sub>165-287</sub> carrying the H186A point mutation. Plasmid derived from pGM287.                                                                                                   | This study |
| pGM309 | Coding sequence of ZorBI <sub>165-287</sub> carrying the R254A point mutation. Plasmid derived from pGM287.                                                                                                   | This study |
| pGM311 | Coding sequence of ZorBI <sub>165-287</sub> carrying the R203A point mutation. Plasmid derived from pGM287.                                                                                                   | This study |

|         |                                                                                                                                                                               |              |
|---------|-------------------------------------------------------------------------------------------------------------------------------------------------------------------------------|--------------|
| pGM312  | Coding sequence of ZorBI <sub>165-287</sub> carrying the R259A point mutation. Plasmid derived from pGM287.                                                                   | This study   |
| pGM328  | Coding sequence of ZorBII <sub>115-235</sub> carrying the H141A point mutation. Plasmid derived from pGM288.                                                                  | This study   |
| pGM329  | Coding sequence of ZorBII <sub>115-235</sub> carrying the R230A point mutation. Plasmid derived from pGM288.                                                                  | This study   |
| pGM41   | Coding sequence of ZorA, followed by ZorB fused to a TEV site and 2xStrepII tag and ZorE fused to a His6x tag in pT12. Sequences were amplified from <i>E. coli</i> ATCC 8739 | This study   |
| pGM289  | Coding sequence ZorB fused to a TEV site and 2xStrepII tag followed by ZorE fused to a His6x tag in pT12. Sequences were amplified from <i>E. coli</i> ATCC 8739              | This study   |
| pGM290  | Coding sequence ZorA followed by ZorE fused to a His6x tag in pT12. Sequences were amplified from <i>E. coli</i> ATCC 8739                                                    | This study   |
| pGM291  | Coding sequence of ZorE fused to a His6x tag in pT12. Sequences were amplified from <i>E. coli</i> ATCC 8739                                                                  | This study   |
| pGM67   | Coding sequence of ZorB fused to a TEV site and 2xStrepII tag inserted in its native position in the Zorya II operon in pGM23.                                                | This study   |
| pSUPROM | Low copy plasmid carrying a constitutive Tat promoter and a Kanamycin resistance gene.                                                                                        | <sup>3</sup> |
| pGM196  | Coding sequence of Zorya II from <i>E. coli</i> ATCC 8739, with its own promoter and terminator, cloned in pSUPROM. Cloning designed to                                       | This study   |

remove the Tat promoter from pSUPROM and replace with Zorya II own promoter.

|        |                                                                                                                                                                                 |            |
|--------|---------------------------------------------------------------------------------------------------------------------------------------------------------------------------------|------------|
| pGM336 | pSUPROM derivative where Tat promoter has been replaced by Zorya II promoter. Promoter sequence obtained from <i>E. coli</i> ATCC 8739                                          | This study |
| pGM337 | Coding sequence of ZorBE in pGM336. . Sequences were amplified from <i>E. coli</i> ATCC 8739                                                                                    | This study |
| pGM338 | Coding sequence of ZorAE in pGM336. . Sequences were amplified from <i>E. coli</i> ATCC 8739                                                                                    | This study |
| pGM339 | Coding sequence of ZorE in pGM336. . Sequences were amplified from <i>E. coli</i> ATCC 8739                                                                                     | This study |
| pGM340 | Coding sequence of ZorAB in pGM336. . Sequences were amplified from <i>E. coli</i> ATCC 8739                                                                                    | This study |
| pGM341 | Coding sequence of ZorA, followed by ZorB fused to a TEV site and 2xStrepII tag and ZorE fused to a His6x tag in pGM336. Sequences were amplified from <i>E. coli</i> ATCC 8739 | This study |
| pGM342 | Coding sequence ZorB fused to a TEV site and 2xStrepII tag followed by ZorE fused to a His6x tag in pGM336. Sequences were amplified from <i>E. coli</i> ATCC 8739              | This study |
| pGM343 | Coding sequence of ZorA followed by ZorE fused to a His6x tag in pGM336. Sequences were amplified from <i>E. coli</i> ATCC 8739                                                 | This study |

pGM344                      Coding sequence of ZorE fused to a His6x tag      This study  
in pGM336. Sequences were amplified from *E.*  
*coli* ATCC 8739

---

1. Baumgarten, T. *et al.* Isolation and characterization of the *E. coli* membrane protein production strain Mutant56(DE3). *Sci. Rep.* **7**, 45089 (2017).
2. Deme, J. C. *et al.* Structures of the stator complex that drives rotation of the bacterial flagellum. *Nat. Microbiol.* **5**, 1553–1564 (2020).
3. Jack, R. L. *et al.* Coordinating assembly and export of complex bacterial proteins. *EMBO J.* **23**, 3962–3972 (2004).





**Supplementary Table 2.** Oligonucleotide primers and additional details for plasmid construction.

| Plasmid | Sequence of relevant primers (5'-3') <sup>a</sup>                                | Description                                                                                                                                                                                                                                    |
|---------|----------------------------------------------------------------------------------|------------------------------------------------------------------------------------------------------------------------------------------------------------------------------------------------------------------------------------------------|
| pGM39   | AACAGAAAAACCGACTAG                                                               | Forward primer delete ecMotAB-TEV-StrepII tag to generate empty vector by KLD                                                                                                                                                                  |
|         | GGTGAATTCCTCCTGAATTTTCATTACG                                                     | Reverse primer delete ecMotAB-TEV-StrepII tag to generate empty vector by KLD                                                                                                                                                                  |
| pGM15   | GAAAACCTGTACTTCCAGGGTCAAT                                                        | Forward primer to clone ZorAB II from <i>Sulfuricurvum kujiense</i> DSM 16994 (SULKU_RS11880 and SULKU_RS11885) in pT12-derived plasmid in frame with a C-term Strep II tag by NEBuilder HiFi DNA Assembly. Primer is used to linearise vector |
|         | GGTGAATTCCTCCTGAATTTTCATTACG<br>AC                                               | Reverse primer to clone ZorAB II from <i>Sulfuricurvum kujiense</i> DSM 16994 (SULKU_RS11880 and SULKU_RS11885) in pT12-derived plasmid in frame with a C-term Strep II tag by NEBuilder HiFi DNA Assembly. Primer is used to linearise vector |
|         | TTTTTAGACTGGTCGTAATGAAATTCAG<br>GAGGAATTCACCGTGATTTCATAATATG<br>GCCTATTTCCGAGTCG | Forward primer to clone ZorAB II from <i>Sulfuricurvum kujiense</i> DSM 16994 (SULKU_RS11880 and SULKU_RS11885) in pT12-derived plasmid in frame with a C-term Strep II tag by NEBuilder HiFi DNA                                              |

|       |                                                                                   |                                                                                                                                                                                                                                                                                                                                          |
|-------|-----------------------------------------------------------------------------------|------------------------------------------------------------------------------------------------------------------------------------------------------------------------------------------------------------------------------------------------------------------------------------------------------------------------------------------|
|       | GGCTCCAGCTCCCGAATTGACCCTGG<br>AAGTACAGGTTTTCTTTTCTACTATAT<br>CGGCGACTTTACGTTCAATG | Assembly. Primer is used to amplify<br>genes of interest<br>Reverse primer to clone ZorAB II<br>from <i>Sulfuricurvum kujiense</i> DSM<br>16994 (SULKU_RS11880 and<br>SULKU_RS11885) in pT12-derived<br>plasmid in frame with a C-term Strep<br>II tag by NEBuilder HiFi DNA<br>Assembly. Primer is used to amplify<br>genes of interest |
| pGM54 | GAAAACCTGTACTTCCAGGGTCAAT                                                         | Forward primer to clone ZorAB I<br>Shewanella sp. ANA-3<br>(SHEWANA3_RS19785<br>SHEWANA3_RS19790 and<br>SHEWANA3_RS19795) in pT12-<br>derived plasmid in frame with a C-<br>term Strep II tag by NEBuilder HiFi<br>DNA Assembly. Primer is used to<br>linearise vector                                                                   |
|       | GGTGAATTCCTCCTGAATTCATTACG<br>AC                                                  | Reverse primer to clone ZorAB I<br>Shewanella sp. ANA-3<br>(SHEWANA3_RS19785<br>SHEWANA3_RS19790 and<br>SHEWANA3_RS19795) in pT12-<br>derived plasmid in frame with a C-<br>term Strep II tag by NEBuilder HiFi<br>DNA Assembly. Primer is used to<br>linearise vector                                                                   |
|       | AAATTCAGGAGGAATTCACCATGGCAA<br>CAGAAAGACAAATTG                                    | Forward primer to clone ZorAB I<br>Shewanella sp. ANA-3<br>(SHEWANA3_RS19785<br>SHEWANA3_RS19790) in pT12-<br>derived plasmid in frame with a C-                                                                                                                                                                                         |

|       |                                                                                                                                                      |                                                                                                                                                                                                                                                                                                                                                                                                                                                                                                                                                                                                                                                                        |
|-------|------------------------------------------------------------------------------------------------------------------------------------------------------|------------------------------------------------------------------------------------------------------------------------------------------------------------------------------------------------------------------------------------------------------------------------------------------------------------------------------------------------------------------------------------------------------------------------------------------------------------------------------------------------------------------------------------------------------------------------------------------------------------------------------------------------------------------------|
|       | CCCTGGAAGTACAGGTTTTCAACATTC<br>TTCGCTTTTTCG                                                                                                          | term Strep II tag by NEBuilder HiFi DNA Assembly. Primer is used to amplify genes of interest<br>Reverse primer to clone ZorAB I Shewanella sp. ANA-3 (SHEWANA3_RS19785 SHEWANA3_RS19790 and SHEWANA3_RS19795) in pT12-derived plasmid in frame with a C-term Strep II tag by NEBuilder HiFi DNA Assembly. Primer is used to amplify genes of interest                                                                                                                                                                                                                                                                                                                 |
| pGM99 | AACATTCTTCGCTTTTTCG<br><br>AACAGAAAAACCGACTAG<br><br>ACGAAAAAGCGAAGAATGTTTAAAGCA<br>TGTGCGTGGAG<br><br>AGCTAGTCGGTTTTTCTGTTCTAACGA<br>ACTACATATCGTTG | Forward primer to clone ZorCD operon from Shewanella sp. ANA-3 in pGM54 by NEBuilder HiFi DNA Assembly, removing the Strep II tag. Primer is used to linearise vector<br>Reverse primer to clone ZorCD operon from Shewanella sp. ANA-3 in pGM54 by NEBuilder HiFi DNA Assembly, removing the Strep II tag. Primer is used to linearise vector<br>Forward primer to clone ZorCD operon from Shewanella sp. ANA-3 in pGM54 by NEBuilder HiFi DNA Assembly, removing the Strep II tag. Primer is used to amplify genes of interest<br>Reverse primer to clone ZorCD operon from Shewanella sp. ANA-3 in pGM54 by NEBuilder HiFi DNA Assembly, removing the Strep II tag. |

|       |                                            |                                                                                                                                                                 |
|-------|--------------------------------------------|-----------------------------------------------------------------------------------------------------------------------------------------------------------------|
|       |                                            | Primer is used to amplify genes of interest                                                                                                                     |
| pGM23 | GGTGAATTCCTCCTGAATTTATTACG                 | Forward primer to clone Zorya II operon from <i>E. coli</i> ATCC 8739 (ECOLC_RS20900, ECOLC_RS20905 and ECOLC_RS20910) in pGM39 by NEBuilder HiFi DNA Assembly. |
|       | TAAAACAGAAAAACCGACTAGCTTGG                 | Reverse primer to clone Zorya II operon from <i>E. coli</i> ATCC 8739 (ECOLC_RS20900, ECOLC_RS20905 and ECOLC_RS20910) in pGM39 by NEBuilder HiFi DNA Assembly. |
|       | AAATTCAGGAGGAATTCACCATGTTAGCGCAGCTTTTGG    | Forward primer to clone Zorya II operon from <i>E. coli</i> ATCC 8739 (ECOLC_RS20900, ECOLC_RS20905 and ECOLC_RS20910) in pGM39 by NEBuilder HiFi DNA Assembly. |
|       | AGGATCCCCGGGTACCCTAGTTGAGACTCGCCAACCATGGGC | Reverse primer to clone Zorya II operon from <i>E. coli</i> ATCC 8739 (ECOLC_RS20900, ECOLC_RS20905 and ECOLC_RS20910) in pGM39 by NEBuilder HiFi DNA Assembly. |
|       |                                            | Primer is used to amplify genes of interest                                                                                                                     |

|       |                            |                                                                                                                                                                                                                             |
|-------|----------------------------|-----------------------------------------------------------------------------------------------------------------------------------------------------------------------------------------------------------------------------|
| pGM35 | TCGATCATGGATAAGATTATAG     | Forward primer delete ZorA from pGM23 by KLD                                                                                                                                                                                |
|       | GGTGAATTCCTCCTGAATTCATTACG | Reverse primer delete ZorA from pGM23 by KLD                                                                                                                                                                                |
| pGM36 | GAGATGAAATTATCTATC         | Forward primer delete ZorB from pGM23 by KLD                                                                                                                                                                                |
|       | GATCGATTACCCTCGATG         | Reverse primer delete ZorB from pGM23 by KLD                                                                                                                                                                                |
| pGM37 | GAGATGAAATTATCTATC         | Forward primer delete ZorAB from pGM23 by KLD                                                                                                                                                                               |
|       | GGTGAATTCCTCCTGAATTCATTACG | Reverse primer delete ZorAB from pGM23 by KLD                                                                                                                                                                               |
| pGM38 | AACAGAAAAACCGACTAG         | Forward primer delete ZorE from pGM23 by KLD                                                                                                                                                                                |
|       | GATTATTCAGGAGTAAGAG        | Reverse primer delete ZorE from pGM23 by KLD                                                                                                                                                                                |
| pGM46 | AACCTAATGGCAGGGCTGATGATG   | Forward primer introduce a D24N mutation in ZorB in pGM23 by KLD                                                                                                                                                            |
|       | TGACATGGATACCCAATGTTC      | Reverse primer introduce a D24N mutation in ZorB in pGM23 by KLD                                                                                                                                                            |
| pGM55 | AAATAAAATGGCAAAAAAC        | Forward primer to delete a aa106-550 in ZorA in pGM23 by KLD                                                                                                                                                                |
|       | TAATCGATCATGGATAAGATTATAG  | Reverse primer to delete a aa106-550 in ZorA in pGM23 by KLD                                                                                                                                                                |
| pGM70 | GGTGAATTCCTCCTGAATTCATTACG | Forward primer to clone Zorya I from <i>S. marcescens</i> ATCC 274(SMATCC274_RS21230, SMATCC274_RS21235 SMATCC274_RS21240 and SMATCC274_RS21245 in pGM39 by NEBuilder HiFi DNA Assembly. Primer is used to linearise vector |

|       |                                                     |                                                                                                                                                                                                                                      |
|-------|-----------------------------------------------------|--------------------------------------------------------------------------------------------------------------------------------------------------------------------------------------------------------------------------------------|
|       | TAAAACAGAAAAACCGACTAGCTTGG                          | Reverse primer to clone Zorya I from <i>S. marcescens</i> ATCC 274(SMATCC274_RS21230, SMATCC274_RS21235 SMATCC274_RS21240 and SMATCC274_RS21245 in pGM39 by NEBuilder HiFi DNA Assembly. Primer is used to linearise vector          |
|       | AAATTCAGGAGGAATTCACCATGGATT<br>CGCTGCTGCTTC         | Forward primer to clone Zorya I from <i>S. marcescens</i> ATCC 274(SMATCC274_RS21230, SMATCC274_RS21235 SMATCC274_RS21240 and SMATCC274_RS21245 in pGM39 by NEBuilder HiFi DNA Assembly. Primer is used to amplify genes of interest |
|       | AGCTAGTCGGTTTTTCTGTTCTAACTG<br>ATTCGATATGAACC       | Reverse primer to clone Zorya I from <i>S. marcescens</i> ATCC 274(SMATCC274_RS21230, SMATCC274_RS21235 SMATCC274_RS21240 and SMATCC274_RS21245 in pGM39 by NEBuilder HiFi DNA Assembly. Primer is used to amplify genes of interest |
| pGM85 | GGTGAATTCCTCCTGAATTCATTAC<br><br>ATGAAATTAAGCGATATC | Forward primer delete ZorAB from pGM70 by KLD<br><br>Reverse primer delete ZorAB from pGM70 by KLD                                                                                                                                   |
| pGM86 | TCATAGCGGCCTCTTCTTCAG                               | Forward primer delete ZorAB from pGM70 by KLD                                                                                                                                                                                        |

|            |                                                    |                                                                                                                                                        |
|------------|----------------------------------------------------|--------------------------------------------------------------------------------------------------------------------------------------------------------|
|            | AACAGAAAAACCGACTAGCTTGGCTG                         | Reverse primer delete ZorAB from pGM70 by KLD                                                                                                          |
| pGM12<br>4 | GGTGAATTCCTCCTGAATTTATTACG                         | Forward primer to clone ZorABC from <i>S. marcescens</i> ATCC 274 in pGM39 by NEBuilder HiFi DNA Assembly. Primer is used to linearise vector          |
|            | TAAACAGAAAAACCGACTAGCTTGG                          | Reverse primer to clone ZorABC from <i>S. marcescens</i> ATCC 274 in pGM39 by NEBuilder HiFi DNA Assembly. Primer is used to linearise vector          |
|            | AAATTCAGGAGGAATTCACCATGGATT<br>CGCTGCTGCTTC        | Forward primer to clone ZorABC from <i>S. marcescens</i> ATCC 274 in pGM39 by NEBuilder HiFi DNA Assembly. Primer is used to amplify genes of interest |
|            | AGCTAGTCGGTTTTTCTGTTTCATGAC<br>AGATACTCAATTTGTTTAC | Reverse primer to clone ZorABC from <i>S. marcescens</i> ATCC 274 in pGM39 by NEBuilder HiFi DNA Assembly. Primer is used to amplify genes of interest |
| pGM12<br>5 | GGTGAATTCCTCCTGAATTTATTACG                         | Forward primer to clone ZorBCD from <i>S. marcescens</i> ATCC 274 in pGM39 by NEBuilder HiFi DNA Assembly. Primer is used to linearise vector          |
|            | TAAACAGAAAAACCGACTAGCTTGG                          | Reverse primer to clone ZorBCD from <i>S. marcescens</i> ATCC 274 in pGM39 by NEBuilder HiFi DNA Assembly. Primer is used to linearise vector          |



|            |                                                     |                                                                                                                                                                            |
|------------|-----------------------------------------------------|----------------------------------------------------------------------------------------------------------------------------------------------------------------------------|
|            | AAATTCAGGAGGAATTCACCATGAGAG<br>CCAACGCCAGTC         | Forward primer to clone ZorBCD from <i>S. marcescens</i> ATCC 274 in pGM39 by NEBuilder HiFi DNA Assembly. Primer is used to amplify genes of interest                     |
|            | AGCTAGTCGGTTTTTCTGTTCTAACTG<br>ATTCGATATGAACCGTCATC | Reverse primer to clone ZorBCD from <i>S. marcescens</i> ATCC 274 in pGM39 by NEBuilder HiFi DNA Assembly. Primer is used to amplify genes of interest                     |
| pGM14<br>0 | AATATGACGGTCAGCTTTCTTTTATTG<br>TTATG                | Forward primer to introduce aD24N mutation in ZorB in pGM70 by NEBuilder HiFi DNA Assembly.                                                                                |
|            | GAAAGCTGACCGTCATATTTGTCATTG<br>AGACAAAAAC           | Reverse primer to introduce aD24N mutation in ZorB in pGM70 by NEBuilder HiFi DNA Assembly.                                                                                |
| pGM14<br>1 | TCATAGCGGCCTCTTCTTC                                 | Forward primer to clone ZorD from <i>S. marcescens</i> ATCC 274 downstream of ZorAB I in pGM86 by NEBuilder HiFi DNA Assembly. Primer is used to linearise vector          |
|            | AACAGAAAAACCGACTAGCTTGGCTG                          | Reverse primer to clone ZorD from <i>S. marcescens</i> ATCC 274 downstream of ZorAB I in pGM86 by NEBuilder HiFi DNA Assembly. Primer is used to linearise vector          |
|            | tgaagaagaggccgctatgaATGACATTTGCTT<br>TCAATCATAATG   | Forward primer to clone ZorD from <i>S. marcescens</i> ATCC 274 downstream of ZorAB I in pGM86 by NEBuilder HiFi DNA Assembly. Primer is used to amplify genes of interest |

|            |                                                                                                                                                              |                                                                                                                                                                                                                                                                                                                                                                                                                                                                                                                                                                                                                                                                                                                                                        |
|------------|--------------------------------------------------------------------------------------------------------------------------------------------------------------|--------------------------------------------------------------------------------------------------------------------------------------------------------------------------------------------------------------------------------------------------------------------------------------------------------------------------------------------------------------------------------------------------------------------------------------------------------------------------------------------------------------------------------------------------------------------------------------------------------------------------------------------------------------------------------------------------------------------------------------------------------|
|            | agctagtcgggttttctgttCTAACTGATTGATAT<br>GAACC                                                                                                                 | Reverse primer to clone ZorD from<br><i>S. marcescens</i> ATCC 274<br>downstream of ZorAB I in pGM86 by<br>NEBuilder HiFi DNA Assembly.<br>Primer is used to amplify genes of<br>interest                                                                                                                                                                                                                                                                                                                                                                                                                                                                                                                                                              |
| pGM14<br>2 | ATGAAATTAAGCGATATCTTCC<br><br>GGTGAATTCCTCCTGAATTCATTACG<br><br>AAATTCAGGAGGAATTCACCATGGATT<br>CGCTGCTGCTTC<br><br>AAGATATCGCTTAATTCATTCATGAGA<br>TTCGCCCTTG | Forward primer to clone ZorA I from<br><i>S. marcescens</i> ATCC 274 upstream<br>of ZorCD in pGM85 by NEBuilder<br>HiFi DNA Assembly. Primer is used<br>to linearise vector<br><br>Reverse primer to clone ZorA I from<br><i>S. marcescens</i> ATCC 274 upstream<br>of ZorCD in pGM85 by NEBuilder<br>HiFi DNA Assembly. Primer is used<br>to linearise vector<br><br>Forward primer to clone ZorA I from<br><i>S. marcescens</i> ATCC 274 upstream<br>of ZorCD in pGM85 by NEBuilder<br>HiFi DNA Assembly. Primer is used<br>to amplify genes of interest<br><br>Reverse primer to clone ZorA I from<br><i>S. marcescens</i> ATCC 274 upstream<br>of ZorCD in pGM85 by NEBuilder<br>HiFi DNA Assembly. Primer is used<br>to amplify genes of interest |
| pGM223     | AATAGAAAGATCTTCGAGGCTG<br><br>ATGAGAGCCAACGCCAGTC                                                                                                            | Forward primer to delete a aa237-678<br>in ZorA in pGM70 by KLD<br><br>Reverse primer to delete a aa237-<br>678 in ZorA in pGM70 by KLD                                                                                                                                                                                                                                                                                                                                                                                                                                                                                                                                                                                                                |
| pGM224     | GCTGGCAAAAAAAGCGAGC                                                                                                                                          | Forward primer to delete a aa43-287<br>in ZorB in pGM70 by KLD                                                                                                                                                                                                                                                                                                                                                                                                                                                                                                                                                                                                                                                                                         |

|       |                                                                                     |                                                                                                                                                                                                                  |
|-------|-------------------------------------------------------------------------------------|------------------------------------------------------------------------------------------------------------------------------------------------------------------------------------------------------------------|
|       | ATGAAATTAAGCGATATC                                                                  | Reverse primer to delete a aa43-287 in ZorB in pGM70 by KLD                                                                                                                                                      |
| pGM59 | GGTGAATTCCTCCTGAATTCATTACG                                                          | Forward primer to clone Zorya II operon from <i>Klebsiella oxytoca</i> 571.31(G0D99_RS19745, G0D99_RS19740 and G0D99_RS19735) in pGM39 by NEBuilder HiFi DNA Assembly. Primer is used to linearise vector        |
|       | TAAAACAGAAAAACCGACTAGCTTGG                                                          | Reverse primer to clone Zorya II operon from <i>Klebsiella oxytoca</i> 571.31 in pGM39 by NEBuilder HiFi DNA Assembly. Primer is used to linearise vector                                                        |
|       | TTTTTAGACTGGTCGTAATGAAATTCAG<br>GAGGAATTCACCATGAAGAAAAGACTT<br>CTACTTCTGTTGTTACTCAT | Forward primer to clone Zorya II operon from <i>Klebsiella oxytoca</i> 571.31 in pGM39 by NEBuilder HiFi DNA Assembly. Primer is used to amplify genes of interest                                               |
|       | AGCTAGTCGGTTTTTCTGTTTCAGCAC<br>TTGTAATTTGTC                                         | Reverse primer to clone Zorya II operon from <i>Klebsiella oxytoca</i> 571.31 in pGM39 by NEBuilder HiFi DNA Assembly. Primer is used to amplify genes of interest                                               |
| pGM60 | GGTGAATTCCTCCTGAATTCATTACG                                                          | Forward primer to clone Zorya II operon II <i>Legionella lansingensis</i> NCTC12830 (CKV79_RS08030, CKV79_RS08025 and CKV79_RS08020) in pGM39 by NEBuilder HiFi DNA Assembly. Primer is used to linearise vector |
|       | TAAAACAGAAAAACCGACTAGCTTGG                                                          | Reverse primer to clone Zorya II operon from <i>Legionella lansingensis</i>                                                                                                                                      |

|       |                                                                                         |                                                                                                                                                                                                        |
|-------|-----------------------------------------------------------------------------------------|--------------------------------------------------------------------------------------------------------------------------------------------------------------------------------------------------------|
|       |                                                                                         | NCTC12830 in pGM39 by NEBuilder HiFi DNA Assembly. Primer is used to linearise vector                                                                                                                  |
|       | TTTTTAGACTGGTCGTAATGAAATTCAG<br>GAGGAATTCACCATGAATAAAATATTT<br>GCTTTATTGTTAGCCCTAGTTTCC | Forward primer to clone Zorya II operon from <i>Legionella lansingensis</i> NCTC12830 in pGM39 by NEBuilder HiFi DNA Assembly. Primer is used to amplify genes of interest                             |
|       | AGCTAGTCGGTTTTTCTGTTTTAAAATT<br>TATTCTTTTTTATTTGCGC                                     | Reverse primer to clone Zorya II operon from <i>Legionella lansingensis</i> NCTC12830 in pGM39 by NEBuilder HiFi DNA Assembly. Primer is used to amplify genes of interest                             |
| pGM61 | GGTGAATTCCTCCTGAATTTCAATTACG                                                            | Forward primer to clone Zorya II operon II from <i>S. marcescens</i> UMH9 (BVG96_RS22930, BVG96_RS22925 and BVG96_RS22920) in pGM39 by NEBuilder HiFi DNA Assembly. Primer is used to linearise vector |
|       | TAAACAGAAAAACCGACTAGCTTGG                                                               | Reverse primer to clone Zorya II operon from <i>S. marcescens</i> UMH9 in pGM39 by NEBuilder HiFi DNA Assembly. Primer is used to linearise vector                                                     |
|       | TTTTTAGACTGGTCGTAATGAAATTCAG<br>GAGGAATTCACCATGTTAGCGCAACTT<br>TTTGAACATCTG             | Forward primer to clone Zorya II operon from <i>S. marcescens</i> UMH9 in pGM39 by NEBuilder HiFi DNA Assembly. Primer is used to amplify genes of interest                                            |
|       | AGCTAGTCGGTTTTTCTGTTTCAGAAA<br>ACAACTCCGGAC                                             | Reverse primer to clone Zorya II operon from <i>S. marcescens</i> UMH9 in pGM39 by NEBuilder HiFi DNA                                                                                                  |

|       |                                             |                                                                                                                                                                     |
|-------|---------------------------------------------|---------------------------------------------------------------------------------------------------------------------------------------------------------------------|
|       |                                             | Assembly. Primer is used to amplify genes of interest                                                                                                               |
| pGM62 | GGTGAATTCCTCCTGAATTCATTACG                  | Forward primer to clone Zorya II operon II from <i>E. coli</i> KTE66 in pGM39 by NEBuilder HiFi DNA Assembly. Primer is used to linearise vector                    |
|       | TAAACAGAAAAACCGACTAGCTTGG                   | Reverse primer to clone Zorya II operon from <i>E. coli</i> KTE66 in pGM39 by NEBuilder HiFi DNA Assembly. Primer is used to linearise vector                       |
|       | AAATTCAGGAGGAATTCACCATGCTGG<br>CACAGCTTTTTG | Forward primer to clone Zorya II operon from <i>E. coli</i> KTE66 in pGM39 by NEBuilder HiFi DNA Assembly. Primer is used to amplify genes of interest              |
|       | AGCTAGTCGGTTTTTCTGTTCTACACC<br>GCGGTGAAGATG | Reverse primer to clone Zorya II operon from <i>E. coli</i> KTE66 in pGM39 by NEBuilder HiFi DNA Assembly. Primer is used to amplify genes of interest              |
| pGM63 | GGTGAATTCCTCCTGAATTCATTACG                  | Forward primer to clone Zorya II operon II from <i>Pseudomonas jinjuensis</i> NBRC10347 in pGM39 by NEBuilder HiFi DNA Assembly. Primer is used to linearise vector |
|       | TAAACAGAAAAACCGACTAGCTTGG                   | Reverse primer to clone Zorya II operon from <i>Pseudomonas jinjuensis</i> NBRC10347 in pGM39 by NEBuilder HiFi DNA Assembly. Primer is used to linearise vector    |

|       |                                                 |                                                                                                                                                                           |
|-------|-------------------------------------------------|---------------------------------------------------------------------------------------------------------------------------------------------------------------------------|
|       | AAATTCAGGAGGAATTCACCATGATTT<br>CCGAGCGCCTG      | Forward primer to clone Zorya II operon from <i>Pseudomonas jinjuensis</i> NBRC10347 in pGM39 by NEBuilder HiFi DNA Assembly. Primer is used to amplify genes of interest |
|       | AGCTAGTCGGTTTTTCTGTTTCAACCA<br>AGACCGCCACAAATTC | Reverse primer to clone Zorya II operon from <i>Pseudomonas jinjuensis</i> NBRC10347 in pGM39 by NEBuilder HiFi DNA Assembly. Primer is used to amplify genes of interest |
| pGM64 | GGTGAATTCCTCCTGAATTCATTACG                      | Forward primer to clone Zorya II operon II from II <i>S. marcescens</i> strain AS012322 in pGM39 by NEBuilder HiFi DNA Assembly. Primer is used to linearise vector       |
|       | TAAACAGAAAAACCGACTAGCTTGG                       | Reverse primer to clone Zorya II operon from II <i>S. marcescens</i> strain AS012322 in pGM39 by NEBuilder HiFi DNA Assembly. Primer is used to linearise vector          |
|       | AAATTCAGGAGGAATTCACCATGTTAG<br>CGCAACTTTTTG     | Forward primer to clone Zorya II operon from II <i>S. marcescens</i> strain AS012322 in pGM39 by NEBuilder HiFi DNA Assembly. Primer is used to amplify genes of interest |
|       | CAAGCTAGTCGGTTTTTCTGTCAGAAA<br>ACAACTCCGGAC     | Reverse primer to clone Zorya II operon from II <i>S. marcescens</i> strain AS012322 in pGM39 by NEBuilder HiFi DNA Assembly. Primer is used to amplify genes of interest |
| pGM94 | TTACTCCTGAATAATCTTTCTAATC                       | Forward primer to clone ZorCD downstream of ZorAB II in pGM61 by                                                                                                          |

|       |                                                    |                                                                                                                                                                                            |
|-------|----------------------------------------------------|--------------------------------------------------------------------------------------------------------------------------------------------------------------------------------------------|
|       | TAAACAGAAAAACCGACTAGCTTGGC                         | NEBuilder HiFi DNA Assembly.<br>Primer is used to linearise vector<br>Reverse primer to clone ZorCD<br>downstream of ZorAB II in pGM61 by<br>NEBuilder HiFi DNA Assembly.                  |
|       | GTCGCATAATTCAGGAATAGATGAAAT<br>TAAGCGATATCTTCC     | Primer is used to linearise vector<br>Forward primer to clone ZorCD<br>downstream of ZorAB II in pGM61 by<br>NEBuilder HiFi DNA Assembly<br>Primer is used to amplify genes of<br>interest |
|       | GCCAAGCTAGTCGGTTTTCTGTTTTA<br>CTAACTGATTGATATGAACC | Reverse primer to clone ZorCD<br>downstream of ZorAB II in pGM61 by<br>NEBuilder HiFi DNA Assembly..<br>Primer is used to amplify genes of<br>interest                                     |
| pGM98 | GGTGAATTCCTCCTGAATTCATTACG                         | Forward primer to clone ZorE from<br>pGM61 downstream of ZorAB I in<br>pGM70 by NEBuilder HiFi DNA<br>Assembly. Primer is used to linearise<br>vector                                      |
|       | AACAGAAAAACCGACTAGCTTGGCTG                         | Reverse primer to clone ZorE from<br>pGM61 downstream of ZorAB I in<br>pGM70 by NEBuilder HiFi DNA<br>Assembly. Primer is used to linearise<br>vector                                      |
|       | TGAAGAAGAGGCCGCTATGAATGAAG<br>CTAACTGTTGATTTTTC    | Forward primer to clone ZorE from<br>pGM61 downstream of ZorAB I in<br>pGM70 by NEBuilder HiFi DNA<br>Assembly Primer is used to amplify<br>genes of interest                              |
|       | AACAGAAAAACCGACTAGCTTGTCAGA<br>AAACAACTCCGGAC      | Reverse primer to ZorE from pGM61<br>downstream of ZorAB I in pGM70 by                                                                                                                     |

|            |                                                                                            |                                                                                                                                                                                                                    |
|------------|--------------------------------------------------------------------------------------------|--------------------------------------------------------------------------------------------------------------------------------------------------------------------------------------------------------------------|
|            |                                                                                            | NEBuilder HiFi DNA Assembly..<br>Primer is used to amplify genes of<br>interest                                                                                                                                    |
| pGM14<br>3 | CCTTTGCGACAAGTCATTATTGATTTTA<br>ATG<br><br>CTTGTCGCAAAGGATCAATAATTTGTT<br>CTG              | Forward primer to introduce a A210P<br>mutation in ZorA II in pGM23 by<br>NEBuilder HiFi DNA Assembly.<br><br>Reverse primer to introduce A210P<br>mutation in ZorA in pGM23 by<br>NEBuilder HiFi DNA Assembly.    |
| pGM14<br>4 | GCAAAAAAAGTTGTTGAGTGGCAGGGA<br>AATTATAAAAC<br><br>CAAGTTTTTTTTGCAGAGGCATCAAGAG<br>CTTTAAAG | Forward primer to introduce a V237A<br>mutation in ZorA II in pGM23 by<br>NEBuilder HiFi DNA Assembly.<br><br>Reverse primer to introduce V237A<br>mutation in ZorA II in pGM23 by<br>NEBuilder HiFi DNA Assembly. |
| pGM14<br>5 | GCGGGAAATTATAAAACGCAAATTGAG<br>CAG<br><br>GTTTTATAATTTCCCGCCCACTCAACAA<br>GTTTTTTTAC       | Forward primer to introduce a Q244A<br>mutation in ZorA II in pGM23 by<br>NEBuilder HiFi DNA Assembly.<br><br>Reverse primer to introduce Q244A<br>mutation in ZorA II in pGM23 by<br>NEBuilder HiFi DNA Assembly. |
| pGM14<br>6 | GCTCCTCTGGCTATGTCTGAACTGCGT<br>GAAG<br><br>CATAGCCAGAGGAGCTTCTTTACATTC<br>TTC              | Forward primer to introduce a I282A<br>mutation in ZorA II in pGM23 by<br>NEBuilder HiFi DNA Assembly.<br><br>Reverse primer to introduce I282A<br>mutation in ZorA II in pGM23 by<br>NEBuilder HiFi DNA Assembly. |
| pGM14<br>7 | GCCTTTGTCGCCATCCGCGATAAAGCT<br>ACAAC                                                       | Forward primer to introduce a T309A<br>mutation in ZorA II in pGM23 by<br>NEBuilder HiFi DNA Assembly.                                                                                                             |



|            |                                              |                                                                                                  |
|------------|----------------------------------------------|--------------------------------------------------------------------------------------------------|
|            | GATGGCGACAAAGGCTTCTAAATGGC<br>GGGAG          | Reverse primer to introduce T309A mutation in ZorA II in pGM23 by NEBuilder HiFi DNA Assembly.   |
| pGM14<br>8 | GCTGAGCAAACCAGCCAGCAAATACTT<br>CTTAATG       | Forward primer to introduce a L346A mutation in ZorA II in pGM23 by NEBuilder HiFi DNA Assembly. |
|            | CTGGTTTGCTCAGCAGATGCACTAACA<br>TTTG          | Reverse primer to introduce L346A mutation in ZorA II in pGM23 by NEBuilder HiFi DNA Assembly.   |
| pGM14<br>9 | GCAGGTACCGAAGGATTCAGACAATC<br>GGTTAC         | Forward primer to introduce a E366A mutation in ZorA II in pGM23 by NEBuilder HiFi DNA Assembly. |
|            | GAATCCTTCGGTACCTGCATCCAGGG<br>CAAC           | Reverse primer to introduce E366A mutation in ZorA II in pGM23 by NEBuilder HiFi DNA Assembly.   |
| pGM15<br>0 | GCAACAATTACTGAAATGAAACAAAGT<br>GGTGAAG       | Forward primer to introduce a E402A mutation in ZorA II in pGM23 by NEBuilder HiFi DNA Assembly. |
|            | CATTTTCAGTAATTGTTGCACCTAACGT<br>GCTGGT       | Reverse primer to introduce E402A mutation in ZorA II in pGM23 by NEBuilder HiFi DNA Assembly.   |
| pGM15<br>2 | GCAGGTCACACAAGTACTGACTGGAC<br>AGGAACAACGAATC | Forward primer to introduce a E139A mutation in ZorB II in pGM23 by NEBuilder HiFi DNA Assembly. |
|            | AGTACTTGTGTGACCTGCAATGCGGAC<br>TTCAGTAA      | Reverse primer to introduce E139A mutation in ZorB II in pGM23 by NEBuilder HiFi DNA Assembly.   |
| pGM15<br>3 | GCCACAAGTACTGACTGGACAGGAAC<br>AACGAATC       | Forward primer to introduce a H141A mutation in ZorB II in pGM23 by NEBuilder HiFi DNA Assembly. |

|            |                                         |                                                                                                  |
|------------|-----------------------------------------|--------------------------------------------------------------------------------------------------|
|            | GTCAGTACTTGTGGCACCTTCAATGCG<br>GACTTC   | Reverse primer to introduce H141A mutation in ZorB II in pGM23 by NEBuilder HiFi DNA Assembly.   |
| pGM15<br>4 | GCAAGTACTGACTGGACAGGAACAAC<br>GAATCCTG  | Forward primer to introduce a T142A mutation in ZorB II in pGM23 by NEBuilder HiFi DNA Assembly. |
|            | GTCAGTACTTGCGTGACCTTCAATGCG<br>GACTTCAG | Reverse primer to introduce T142A mutation in ZorB II in pGM23 by NEBuilder HiFi DNA Assembly.   |
| pGM15<br>5 | GCTACTGACTGGACAGGAACAACGAAT<br>CCTG     | Forward primer to introduce a S143A mutation in ZorB II in pGM23 by NEBuilder HiFi DNA Assembly. |
|            | GTCAGTAGCTGTGTGACCTTCAATGCG<br>GACTTC   | Reverse primer to introduce S143A mutation in ZorB II in pGM23 by NEBuilder HiFi DNA Assembly.   |
| pGM15<br>6 | GCCTGGACAGGAACAACGAATCCTGA<br>TATTG     | Forward primer to introduce a D145A mutation in ZorB II in pGM23 by NEBuilder HiFi DNA Assembly. |
|            | CTGTCCAGGCAGTACTTGTGTGACCTT<br>CAATG    | Reverse primer to introduce D145A mutation in ZorB II in pGM23 by NEBuilder HiFi DNA Assembly.   |
| pGM15<br>7 | GCAAGTAAATTTGCCGCAGTAGGTTAT<br>TCATC    | Forward primer to introduce a K188A mutation in ZorB II in pGM23 by NEBuilder HiFi DNA Assembly. |
|            | CGGCAAATTTACTTGCAACCCATTGTT<br>GGTGTGTC | Reverse primer to introduce K188A mutation in ZorB II in pGM23 by NEBuilder HiFi DNA Assembly.   |
| pGM15<br>8 | GCTTCATCTGCACATCCCATTCTTGAT<br>AAAAC    | Forward primer to introduce a Y196A mutation in ZorB II in pGM23 by NEBuilder HiFi DNA Assembly. |
|            | GATGTGCAGATGAAGCACCTACTGCG<br>GCAAAT    | Reverse primer to introduce Y196A mutation in ZorB II in pGM23 by NEBuilder HiFi DNA Assembly.   |

|            |                                                                                               |                                                                                                                                                                                                        |
|------------|-----------------------------------------------------------------------------------------------|--------------------------------------------------------------------------------------------------------------------------------------------------------------------------------------------------------|
| pGM15<br>9 | GCTCGTGTCACCTTCAAAGTTGTAACA<br>AATG<br><br>CTTTGAAGGTGACACGAGCAGAGCGA<br>TTAGG                | Forward primer to introduce a R215A mutation in ZorB II in pGM23 by NEBuilder HiFi DNA Assembly.<br><br>Reverse primer to introduce R215A mutation in ZorB II in pGM23 by NEBuilder HiFi DNA Assembly. |
| pGM16<br>0 | GCTATTCAGGAGTAAGAGATGAAATTA<br>TC<br><br>CTTACTCCTGAATAGCCTTTCTAATCTG<br>CAAC                 | Forward primer to introduce a I232A mutation in ZorB II in pGM23 by NEBuilder HiFi DNA Assembly.<br><br>Reverse primer to introduce I232A mutation in ZorB II in pGM23 by NEBuilder HiFi DNA Assembly. |
| pGM16<br>1 | GCAGACCTTCCAAGAGCGATCTCTGA<br>GTCTATTAG<br><br>CTCTTGGAAGGTCTGCGCGCAACGGA<br>CGACCAATCTCAG    | Forward primer to introduce a E267A mutation in ZorA I in pGM70 by NEBuilder HiFi DNA Assembly.<br><br>Reverse primer to introduce a E267A mutation in ZorA I in pGM70 by NEBuilder HiFi DNA Assembly. |
| pGM16<br>2 | CCTATTACGCCGGTTATCGAACAAGTA<br>AGCAGGTTG<br><br>CGATAACCGGCGTAATAGGCGTACTAA<br>TAGACTCAGAGATC | Forward primer to introduce a A280P mutation in ZorA I in pGM70 by NEBuilder HiFi DNA Assembly.<br><br>Reverse primer to introduce a A280P mutation in ZorA I in pGM70 by NEBuilder HiFi DNA Assembly. |
| pGM16<br>3 | GGCCTCTCTTCACGTTTTTCTGAAGAT<br>GTTGGTCG<br><br>GTGAAGAGAGGCCTTGTACCATCTCTC<br>CCACACCATC      | Forward primer to introduce a S302P mutation in ZorA I in pGM70 by NEBuilder HiFi DNA Assembly.<br><br>Reverse primer to introduce a S302P mutation in ZorA I in pGM70 by NEBuilder HiFi DNA Assembly. |
| pGM16<br>4 | GGCCTCTCTTCACGTTTTTCTGAAGAT<br>GTTGGTCG                                                       | Forward primer to introduce a S319A mutation in ZorA I in pGM70 by NEBuilder HiFi DNA Assembly.                                                                                                        |

|            |                                                                                                   |                                                                                                                                                                                                        |
|------------|---------------------------------------------------------------------------------------------------|--------------------------------------------------------------------------------------------------------------------------------------------------------------------------------------------------------|
|            | GTGAAGAGAGGCCTTGTACCATCTCTC<br>CCACACCATC                                                         | Reverse primer to introduce a S319A mutation in ZorA I in pGM70 by NEBuilder HiFi DNA Assembly.                                                                                                        |
| pGM16<br>5 | GGCGAACGTATTTCCCTGGCAGGAGA<br>CCAGATTAAATTG<br><br>CAGGGAAATACGTTCCGCCGGCTTGTG<br>CCAGAGCCCCGAC   | Forward primer to introduce a L361A mutation in ZorA I in pGM70 by NEBuilder HiFi DNA Assembly.<br><br>Reverse primer to introduce a L361A mutation in ZorA I in pGM70 by NEBuilder HiFi DNA Assembly. |
| pGM16<br>6 | GCGCGTGATGGTATGCAGCAAACGGC<br>AGATACAGCAACATC<br><br>CTGCATACCATCACGCGCTGTTTCCAC<br>CGCCTGGCCTAAG | Forward primer to introduce a Q392A mutation in ZorA I in pGM70 by NEBuilder HiFi DNA Assembly.<br><br>Reverse primer to introduce a Q392A mutation in ZorA I in pGM70 by NEBuilder HiFi DNA Assembly. |
| pGM16<br>7 | GCAGGCATCAAAGACAATACCGGTGA<br>GGGTGCGCGAG<br><br>TATTGTCTTTGATGCCTGCCAGGGTTG<br>AATTCATGGTCG      | Forward primer to introduce a L423A mutation in ZorA I in pGM70 by NEBuilder HiFi DNA Assembly.<br><br>Reverse primer to introduce a L423A mutation in ZorA I in pGM70 by NEBuilder HiFi DNA Assembly. |
| pGM16<br>8 | GCCGAAGTTGCAGCGAAACAGGGGGC<br>TGAAGCAGCGCAG<br><br>GTTTCGCTGCAACTTCGGCTTCGGTAC<br>GAATACCCAGAG    | Forward primer to introduce a K444A mutation in ZorA I in pGM70 by NEBuilder HiFi DNA Assembly.<br><br>Reverse primer to introduce a K444A mutation in ZorA I in pGM70 by NEBuilder HiFi DNA Assembly. |
| pGM16<br>9 | GCGGCCAGCGACGCGATTGGCCAGG<br>CCGCAACACAAGTG<br><br>CGTCGCTGGCCGCAGACGCTGATTCA<br>GACATCCGCGCCTGC  | Forward primer to introduce a E481A mutation in ZorA I in pGM70 by NEBuilder HiFi DNA Assembly.<br><br>Reverse primer to introduce a E481A mutation in ZorA I in pGM70 by NEBuilder HiFi DNA Assembly. |

|            |                                                                                                 |                                                                                                                                                                                                        |
|------------|-------------------------------------------------------------------------------------------------|--------------------------------------------------------------------------------------------------------------------------------------------------------------------------------------------------------|
| pGM17<br>0 | GCATTGCTTTCTCCTCTTTCTGTTATCG<br>CTGAAAAACTG<br><br>GAGGAGAAAGCAATGCGCTGCTGGCT<br>TTCTGGGTCATC   | Forward primer to introduce a A520P mutation in ZorA I in pGM70 by NEBuilder HiFi DNA Assembly.<br><br>Reverse primer to introduce a A520P mutation in ZorA I in pGM70 by NEBuilder HiFi DNA Assembly. |
| pGM17<br>1 | CCCTCGGAGAACGCTTCAGGAAGCTT<br>CCGCACATC<br><br>GCGTTCTCCGAGGGGACAGCACCTTC<br>TTTAATCCCATC       | Forward primer to introduce a S598A mutation in ZorA I in pGM70 by NEBuilder HiFi DNA Assembly.<br><br>Reverse primer to introduce a S598A mutation in ZorA I in pGM70 by NEBuilder HiFi DNA Assembly. |
| pGM17<br>2 | GCTACGCTAAATAATCTTCAGTCTTTGA<br>TTGCGGCTTTAC<br><br>GATTATTTAGCGTAGCTTCAACCGCCC<br>GATGCTGCCCCG | Forward primer to introduce a Y631A mutation in ZorA I in pGM70 by NEBuilder HiFi DNA Assembly.<br><br>Reverse primer to introduce a Y631A mutation in ZorA I in pGM70 by NEBuilder HiFi DNA Assembly. |
| pGM17<br>3 | GCTCAACAGCAAGTTGCTACGTCGGTT<br>GAAACGCTCTTC<br><br>CAACTTGCTGTTGAGCACTGTCTGAATG<br>CCTTGCCAAG   | Forward primer to introduce a V664A mutation in ZorA I in pGM70 by NEBuilder HiFi DNA Assembly.<br><br>Reverse primer to introduce a V664A mutation in ZorA I in pGM70 by NEBuilder HiFi DNA Assembly. |
| pGM17<br>5 | GCAGGTCACACCGACTCCAAAGGCGA<br>AGATGTTTATAAC<br><br>GAGTCGGTGTGACCTGCAATCTGTACC<br>GCTTCAATAATGG | Forward primer to introduce a N184A mutation in ZorB I in pGM70 by NEBuilder HiFi DNA Assembly.<br><br>Reverse primer to introduce a N184A mutation in ZorB I in pGM70 by NEBuilder HiFi DNA Assembly. |
| pGM17<br>6 | GCCACCGACTCCAAAGGCGAAGATGT<br>TTATAACCTGAATC                                                    | Forward primer to introduce a H186A mutation in ZorB I in pGM70 by NEBuilder HiFi DNA Assembly.                                                                                                        |

|            |                                                                                                    |                                                                                                                                                                                                        |
|------------|----------------------------------------------------------------------------------------------------|--------------------------------------------------------------------------------------------------------------------------------------------------------------------------------------------------------|
|            | CTTTGGAGTCGGTGGCACCTTCAATCT<br>GTACCGCTTCAATAATG                                                   | Reverse primer to introduce a H186A mutation in ZorB I in pGM70 by NEBuilder HiFi DNA Assembly.                                                                                                        |
| pGM18<br>0 | GCTTCGACTAACCGAGCCATCACCAC<br>GTTTACCAGTATG<br><br>GATGGCTCGGTTAGTCGAAGCATTGAG<br>GTTATAAAC        | Forward primer to introduce a L199A mutation in ZorB I in pGM70 by NEBuilder HiFi DNA Assembly.<br><br>Reverse primer to introduce a L199A mutation in ZorB I in pGM70 by NEBuilder HiFi DNA Assembly. |
| pGM18<br>1 | GCAGCCATCACCACGTTTACCAGTATG<br>CTTGCCGCAG<br><br>GTAAACGTGGTGATGGCTGCGTTAGTC<br>GAAAGATTC          | Forward primer to introduce a R203A mutation in ZorB I in pGM70 by NEBuilder HiFi DNA Assembly.<br><br>Reverse primer to introduce a R203A mutation in ZorB I in pGM70 by NEBuilder HiFi DNA Assembly. |
| pGM18<br>3 | GCCCGTATCGATCTCCGCATCATTATG<br>CATACCCCGGC<br><br>GAGATCGATACGGGCATTCATCGCCAT<br>ATTTTGCGGTG       | Forward primer to introduce a R254A mutation in ZorB I in pGM70 by NEBuilder HiFi DNA Assembly.<br><br>Reverse primer to introduce a R254A mutation in ZorB I in pGM70 by NEBuilder HiFi DNA Assembly. |
| pGM18<br>5 | GCCATCATTATGCATACCCCGGCCAAT<br>GCAGCGGAAATTGAAG<br><br>GTATGCATAATGATGGCGAGATCGATA<br>CGGCGATTCATC | Forward primer to introduce a R259A mutation in ZorB I in pGM70 by NEBuilder HiFi DNA Assembly.<br><br>Reverse primer to introduce a R259A mutation in ZorB I in pGM70 by NEBuilder HiFi DNA Assembly. |
| pGM29      | GGTGAATTCCTCCTGAATTCATTAC                                                                          | Forward primer to clone ZorE from <i>E. coli</i> ATCC8739 in pT12-derived plasmid in frame with a C-term Strep II tag by NEBuilder HiFi DNA Assembly. Primer is used to linearise vector               |

|            |                                                    |                                                                                                                                                                                                                |
|------------|----------------------------------------------------|----------------------------------------------------------------------------------------------------------------------------------------------------------------------------------------------------------------|
|            | GAAAACCTGTACTTCCAGGGTC                             | Reverse primer to clone ZorE from <i>E. coli</i> ATCC8739 in pT12-derived plasmid in frame with a C-term Strep II tag by NEBuilder HiFi DNA Assembly. Primer is used to linearise vector                       |
|            | AAATTCAGGAGGAATTCACCATGAAAT<br>TATCTATCGACATTTTCAG | Forward primer to clone ZorE from <i>E. coli</i> ATCC8739 in pT12-derived plasmid in frame with a C-term Strep II tag by NEBuilder HiFi DNA Assembly. Primer is used to amplify genes of interest              |
|            | CCCTGGAAGTACAGGTTTTCCAATTTT<br>GCTGGCGTAAAG        | Reverse primer to clone ZorE from <i>E. coli</i> ATCC8739 in pT12-derived plasmid in frame with a C-term Strep II tag by NEBuilder HiFi DNA Assembly. Primer is used to amplify genes of interest              |
| pGM28<br>8 | GAAAACCTGTACTTCCAGGGTCAAT                          | Forward primer to clone ZorB II <sub>115-235</sub> from <i>E. coli</i> ATCC8739 in pT12-derived plasmid in frame with a C-term Strep II tag by NEBuilder HiFi DNA Assembly. Primer is used to linearise vector |
|            | GGTGAATTCCTCCTGAATTCATTACGAC                       | Reverse primer to clone ZorB II <sub>115-235</sub> from <i>E. coli</i> ATCC8739 in pT12-derived plasmid in frame with a C-term Strep II tag by NEBuilder HiFi DNA Assembly. Primer is used to linearise vector |
|            | AAATTCAGGAGGAATTCACCCTTGACGACTT<br>CTTTCCTC        | Forward primer to clone ZorB II <sub>115-235</sub> from <i>E. coli</i> ATCC8739 in pT12-derived plasmid in frame with a C-                                                                                     |

|            |                                                                                                                 |                                                                                                                                                                                                                                                                                                                                                                                                                                                                                                                                                                                                                                                                                                                                      |
|------------|-----------------------------------------------------------------------------------------------------------------|--------------------------------------------------------------------------------------------------------------------------------------------------------------------------------------------------------------------------------------------------------------------------------------------------------------------------------------------------------------------------------------------------------------------------------------------------------------------------------------------------------------------------------------------------------------------------------------------------------------------------------------------------------------------------------------------------------------------------------------|
|            | CCCTGGAAGTACAGGTTTTCTCCTGAATAA<br>TCTTTC                                                                        | term Strep II tag by NEBuilder HiFi DNA Assembly. Primer is used to amplify genes of interest. Primers also used to amplify correspondent point mutations.<br>Reverse primer to clone ZorB II <sub>115-235</sub> from <i>E. coli</i> ATCC8739 in pT12-derived plasmid in frame with a C-term Strep II tag by NEBuilder HiFi DNA Assembly. Primer is used to amplify genes of interest. Primers also used to amplify correspondent point mutations.                                                                                                                                                                                                                                                                                   |
| pGM28<br>7 | GAAAACCTGTACTTCCAGGGTCAAT<br><br>GGTGAATTCCTCCTGAATTCATTACGAC<br><br>AAATTCAGGAGGAATTCACCGTCGGGT<br>GGGATAAAAAC | Forward primer to clone ZorB I <sub>165-287</sub> from <i>S. marcescens</i> ATCC274 in pT12-derived plasmid in frame with a C-term Strep II tag by NEBuilder HiFi DNA Assembly. Primer is used to linearise vector<br>Reverse primer to clone ZorB I <sub>165-287</sub> from <i>S. marcescens</i> ATCC274 in pT12-derived plasmid in frame with a C-term Strep II tag by NEBuilder HiFi DNA Assembly. Primer is used to linearise vector<br>Forward primer to clone ZorB I <sub>165-287</sub> from <i>S. marcescens</i> ATCC274 in pT12-derived plasmid in frame with a C-term Strep II tag by NEBuilder HiFi DNA Assembly. Primer is used to amplify genes of interest. Primers also used to amplify correspondent point mutations. |



|            |                                                |                                                                                                                                                                                                                                                                                          |
|------------|------------------------------------------------|------------------------------------------------------------------------------------------------------------------------------------------------------------------------------------------------------------------------------------------------------------------------------------------|
|            | CCCTGGAAGTACAGGTTTTCTAGCGGCCTCT<br>TCTTCAGGG   | Reverse primer to clone ZorB I <sub>165-287</sub> from <i>S. marcescens</i> ATCC274 in pT12-derived plasmid in frame with a C-term Strep II tag by NEBuilder HiFi DNA Assembly. Primer is used to amplify genes of interest. Primers also used to amplify correspondent point mutations. |
| pGM19<br>6 | AGAATTCAGTGGCCGTCGTTTTAC                       | Forward primer to clone Zorya II with its own promoter from <i>E. coli</i> ATCC8739 in pSUPROM by NEBuilder HiFi DNA Assembly. Primer binds to the vector and are designed to remove the Tat promoter to insert Zorya II with its own promoter and terminator                            |
|            | TCTAGAGTCGACCCCTCG                             | Reverse primer to clone Zorya II with its own promoter from <i>E. coli</i> ATCC8739 in pSUPROM by NEBuilder HiFi DNA Assembly. Primer binds to the vector and are designed to remove the Tat promoter to insert Zorya II with its own                                                    |
|            | AACGACGGCCAGTGAATTCTCCTGCCT<br>TCCTTTGATAC     | Forward primer to clone Zorya II with its own promoter from <i>E. coli</i> ATCC8739 in pSUPROM by NEBuilder HiFi DNA Assembly. Primer binds to insert.                                                                                                                                   |
|            | CTCGAGGGGTCGACTCTAGATTACAATTTTG<br>CTGGCGTAAAG | Reverse primer to clone Zorya II with its own promoter from <i>E. coli</i> ATCC8739 in pSUPROM by                                                                                                                                                                                        |

NEBuilder HiFi DNA Assembly.  
Primer binds to insert.

|            |                                                       |                                                                                                                                                                                                                                                     |
|------------|-------------------------------------------------------|-----------------------------------------------------------------------------------------------------------------------------------------------------------------------------------------------------------------------------------------------------|
| pGM33<br>6 | TCTAGAGTCGACCCCTCG<br><br>TTTGATACCTGTGTAAATAATGG     | Forward primer to delete Zorya II from pSUPROM by KLD leaving Zorya II specific promoter in the to replace Tat promoter.<br>Reverse primer to delete Zorya II from pSUPROM by KLD leaving ZoryaII specific promoter in the to replace Tat promoter. |
| pGM33<br>7 | GATCGATTACCCTCGATG<br><br>GATTATTCAGGAGTAAGAG         | Forward primer to delete ZorA from pGM196 by KLD.<br>Reverse primer to delete ZorA from pGM196 by KLD.                                                                                                                                              |
| pGM33<br>8 | ATGGATAAGATTATAGGGAAAC<br><br>GATCGATTACCCTCGATG      | Forward primer to delete ZorB from pGM196 by KLD.<br>Reverse primer to delete ZorB from pGM196 by KLD.                                                                                                                                              |
| pGM33<br>9 | ATGGATAAGATTATAGGGAAAC<br><br>TTTGATACCTGTGTAAATAATGG | Forward primer to delete ZorAB from pGM196 by KLD.<br>Reverse primer to delete ZorAB from pGM196 by KLD.                                                                                                                                            |
| pGM34<br>0 | GATTATTCAGGAGTAAGAG<br><br>TCTAGAGTCGACCCCTCG         | Forward primer to delete ZorE from pGM196 by KLD.<br>Reverse primer to delete ZorE from pGM196 by KLD.                                                                                                                                              |
| pGM34<br>1 | TCTAGAGTCGACCCCTCG                                    | Forward primer to clone the coding sequence of ZorA, followed by ZorB fused to a TEV site and 2xStreptII tag and ZorE fused to a His6x tag in pGM336, under the control of Zorya II native promoter NEBuilder HiFi                                  |

|                                                    |                                                                                                                                                                                                                                                                                                                                                                                                                                                                                                                                                                                                                                                                                                                                                                                                                                                                                                            |
|----------------------------------------------------|------------------------------------------------------------------------------------------------------------------------------------------------------------------------------------------------------------------------------------------------------------------------------------------------------------------------------------------------------------------------------------------------------------------------------------------------------------------------------------------------------------------------------------------------------------------------------------------------------------------------------------------------------------------------------------------------------------------------------------------------------------------------------------------------------------------------------------------------------------------------------------------------------------|
|                                                    | <p>DNA Assembly. Primer linearises vector.</p> <p>Reverse primer to clone the coding sequence of ZorA, followed by ZorB fused to a TEV site and 2xStrepII tag and ZorE fused to a His6x tag in pGM336, under the control of Zorya II native promoter NEBuilder HiFi DNA Assembly. Primer linearises vector.</p> <p>Forward primer to clone the coding sequence of ZorA, followed by ZorB fused to a TEV site and 2xStrepII tag and ZorE fused to a His6x tag in pGM336, under the control of Zorya II native promoter NEBuilder HiFi DNA Assembly. Primer linearises vector. Insert amplified from pGM41.</p> <p>Reverse primer to clone the coding sequence of ZorA, followed by ZorB fused to a TEV site and 2xStrepII tag and ZorE fused to a His6x tag in pGM336, under the control of Zorya II native promoter NEBuilder HiFi DNA Assembly. Primer linearises vector. Insert amplified from pGM41</p> |
| TTTGATACCTGTGTAAATAATGG                            |                                                                                                                                                                                                                                                                                                                                                                                                                                                                                                                                                                                                                                                                                                                                                                                                                                                                                                            |
| CATTATTTACACAGGTATCAAA<br>ATGTTAGCGCAGCTTTTGGAG    |                                                                                                                                                                                                                                                                                                                                                                                                                                                                                                                                                                                                                                                                                                                                                                                                                                                                                                            |
| GGGTCGACTCTAGAGGATCC<br>GTGATGGTGATGGTGATGCAATTTTG |                                                                                                                                                                                                                                                                                                                                                                                                                                                                                                                                                                                                                                                                                                                                                                                                                                                                                                            |
| pGM34<br>2                                         | <p>TCTAGAGTCGACCCCTCG</p> <p>Forward primer to clone the coding sequence ZorB fused to a TEV site and 2xStrepII tag followed by ZorE fused to a His6x tag in pGM336 by NEBuilder HiFi DNA Assembly. Primer binds to vector to linearise it</p>                                                                                                                                                                                                                                                                                                                                                                                                                                                                                                                                                                                                                                                             |

|            |                                                     |                                                                                                                                                                                                                  |
|------------|-----------------------------------------------------|------------------------------------------------------------------------------------------------------------------------------------------------------------------------------------------------------------------|
|            | TTTGATACCTGTGTAAATAATGG                             | Reverse primer to clone the coding sequence ZorB fused to a TEV site and 2xStrepII tag followed by ZorE fused to a His6x tag in pGM336 by NEBuilder HiFi DNA Assembly.                                           |
|            | CATTATTTACACAGGTATCAAA<br>ATGGATAAGATTATAGGGAAAC    | Primer binds to vector to linearise it<br>Forward primer to clone the coding sequence ZorB fused to a TEV site and 2xStrepII tag followed by ZorE fused to a His6x tag in pGM336 by NEBuilder HiFi DNA Assembly. |
|            | GGGTCTGACTCTAGAGGATCC<br>GTGATGGTGATGGTGATGCAATTTTG | Insert amplified from pGM289<br>Reverse primer to clone the coding sequence ZorB fused to a TEV site and 2xStrepII tag followed by ZorE fused to a His6x tag in pGM336 by NEBuilder HiFi DNA Assembly.           |
| pGM34<br>3 | TCTAGAGTCGACCCCTCG                                  | Insert amplified from pGM289<br>Forward primer to clone the coding sequence of ZorA followed by ZorE fused to a His6x tag in pGM336 by NEBuilder HiFi DNA Assembly.                                              |
|            | TTTGATACCTGTGTAAATAATGG                             | Primer binds to vector to linearise it<br>Reverse primer to clone the coding sequence of ZorA followed by ZorE fused to a His6x tag in pGM336 by NEBuilder HiFi DNA Assembly.                                    |
|            | CATTATTTACACAGGTATCAAA<br>ATGTTAGCGCAGCTTTTTGAG     | Primer binds to vector to linearise it<br>Forward primer to clone the coding sequence of ZorA followed by ZorE fused to a His6x tag in pGM336 by NEBuilder HiFi DNA Assembly.                                    |
|            |                                                     | Insert amplified from pGM290                                                                                                                                                                                     |

|            |                                                    |                                                                                                                                                                  |
|------------|----------------------------------------------------|------------------------------------------------------------------------------------------------------------------------------------------------------------------|
|            | GGGTCGACTCTAGAGGATCC<br>GTGATGGTGATGGTGATGCAATTTTG | Reverse primer to clone the coding sequence of ZorA followed by ZorE fused to a His6x tag in pGM336 by NEBuilder HiFi DNA Assembly. Insert amplified from pGM290 |
| pGM34<br>4 | TCTAGAGTCGACCCCTCG                                 | Forward primer to clone the coding sequence of ZorE fused to a His6x tag in pGM336 by NEBuilder HiFi DNA Assembly. Primer binds to vector to linearise it        |
|            | TTTGATACCTGTGTAAATAATGG                            | Reverse primer to clone the coding sequence of ZorE fused to a His6x tag in pGM336 by NEBuilder HiFi DNA Assembly. Primer binds to vector to linearise it        |
|            | CATTATTTACACAGGTATCAAA<br>ATGAAATTATCTATCGAC       | Forward primer to clone the coding sequence of ZorE fused to a His6x tag in pGM336 by NEBuilder HiFi DNA Assembly. Insert amplified from pGM291                  |
|            | GGGTCGACTCTAGAGGATCC<br>GTGATGGTGATGGTGATGCAATTTTG | Reverse primer to clone the coding sequence of ZorE fused to a His6x tag in pGM336 by NEBuilder HiFi DNA Assembly. Insert amplified from pGM291.                 |

---
